# Supplementary material for: Highly contiguous assemblies of 101 drosophilid genomes
Source: eLife journal article supplement (doi:10.7554/elife.66405), 2021-07-19
Supplement: supp [file elife_poa_e66405_Supplementary_file_3.xlsx]

## Sheet: Table S3
			Diversity estimated from long reads							Diversity estimated from short reads
species	strain	short read source	number of callable sites	number of het. non-reference SNPs	number of hom. non-reference SNPs	per-site heterozygosity	SNPs per site (het. + hom.)	number of het. indels	number of hom. indels	number of callable sites	number of het. non-reference SNPs	number of hom. non-reference SNPs	per-site heterozygosity	SNPs per site (het. + hom.)	number of het. indels	number of hom. indels
Chymomyza costata	Sapporo	same strain, SRA	186541140	721389	11696	0.00386718	0.00392988	68366	8587	241911526	1359157	28450	0.00561841	0.00573601	127550	6254
Drosophila ambigua	R42	same sample	87600157	474981	1143	0.00542215	0.0054352	43452	1524	119222146	1096017	5392	0.00919307	0.00923829	130204	2397
Drosophila americana	15010-0951.00	same sample	106466074	178363	741	0.0016753	0.00168226	15000	365	125728906	370398	2533	0.00294601	0.00296615	32689	927
Drosophila ananassae	14024-0371.13	same sample	68439946	1534	888	2.24138e-05	3.53887e-05	83	139	112067782	14263	1105	0.000127271	0.000137131	1214	57
Drosophila arawakana	15182-2261.03	same sample	112852229	349788	5388	0.00309952	0.00314727	29233	1934	102037313	674088	3702	0.00660629	0.00664257	40660	847
Drosophila biarmipes	14023-0361.10	same strain, SRA	60418011	478526	70829	0.00792025	0.00909257	29747	6700	126125978	36444	12715	0.000288949	0.000389761	4800	1017
Drosophila bipectinata	14024-0381.04	same sample	80128868	78234	720	0.000976352	0.000985338	4060	406	119421125	232072	2613	0.00194331	0.00196519	12193	318
Drosophila bocqueti	YAK3_mont-66	same sample	85471250	584158	1157	0.00683456	0.00684809	42139	1248	132218404	1899600	13845	0.0143671	0.0144719	181462	3078
Drosophila cardini	15181-2181.03	same sample	97238029	181863	2590	0.00187029	0.00189692	15602	1023	110650169	313378	3627	0.00283215	0.00286493	25610	973
Drosophila carrolli	KB866	same sample	92958406	336079	2589	0.00361537	0.00364322	23645	1780	107311985	397905	2570	0.00370793	0.00373188	26244	905
Drosophila dunni	15182-2291.00	same sample	96380954	157028	2640	0.00162924	0.00165663	11938	757	110193660	260081	3181	0.00236022	0.00238908	16381	538
Drosophila elegans	14027-0461.03	same strain, SRA	102435447	9180	711	8.96174e-05	9.65584e-05	615	85	124755980	159793	951	0.00128084	0.00128847	6626	66
Drosophila equinoxialis	14030-0741.00	none	100025637	170296	2806	0.00170252	0.00173058	17530	1624	NA	NA	NA	NA	NA	NA	NA
Drosophila ercepeae	14024-0432.00	same strain, SRA	87832586	370	706384	4.21256e-06	0.0080466	42	67343	116608618	50444	30944	0.000432592	0.000697959	10273	2148
Drosophila erecta	14021-0224.01	same sample	57174802	831	308	1.45344e-05	1.99214e-05	18	44	106733873	11609	1332	0.000108766	0.000121245	1118	54
Drosophila eugracilis	14026-0451.02	same sample	48167149	369353	316	0.00766815	0.00767471	12627	80	89977645	632637	6702	0.00703105	0.00710553	57243	2017
Drosophila ficusphila	14025-0441.05	same strain, SRA	105620364	26647	868	0.00025229	0.000260508	1826	164	4835534	3596	72	0.000743661	0.000758551	138	1
Drosophila funebris	fst01	none	103345637	629	619	6.08637e-06	1.2076e-05	48	289	NA	NA	NA	NA	NA	NA	NA
Drosophila fuyamai	KB-1217	same sample	84864674	151340	697	0.00178331	0.00179152	9832	426	128264214	238176	2247	0.00185692	0.00187444	18948	704
Drosophila grimshawi	15287-2541.00	same strain, SRA	107185860	321909	543	0.00300328	0.00300834	29148	1071	74443337	159216	13904	0.00213875	0.00232553	14014	86
Drosophila immigrans	15111.1731.12	same sample	119741696	216889	2853	0.00181131	0.00183513	20547	1699	124401664	270159	3565	0.00217167	0.00220032	27435	831
Drosophila immigrans	kari17	different sample, this study	103031800	492244	4360	0.00477759	0.00481991	46934	53199	117972076	294648	1107768	0.00249761	0.0118877	35133	300
Drosophila insularis	jp01i	same sample	107539910	13732	1139	0.000127692	0.000138284	1414	280	140821574	71959	13078	0.000510994	0.000603863	8236	422
Drosophila jambulina	14028-0671.01	same sample	98133659	2241	27697	2.28362e-05	0.000305074	160	4135	132532634	332377	1304	0.00250789	0.00251773	26297	391
Drosophila kikkawai	14028-0561.14	same strain, SRA	95872179	1567	817	1.63447e-05	2.48664e-05	95	225	117023052	2490	2930	2.12779e-05	4.63157e-05	1039	118
Drosophila kurseongensis	SaPa58	same sample	89143845	339716	1897	0.00381087	0.00383215	22600	1293	102952391	440052	6624	0.00427433	0.00433867	25618	723
Drosophila littoralis	Kilpisjärvi 1	same sample	95902845	258197	1189	0.00269228	0.00270467	17336	675	133344012	360241	3235	0.00270159	0.00272585	38386	1425
Drosophila malerkotliana malerkotliana	mal0-isoC	same sample	82010985	21275	2724	0.000259416	0.000292632	1431	468	31698895	32551	587	0.00102688	0.0010454	1849	66
Drosophila malerkotliana pallens	palQ-isoG	same sample	91237823	227088	661	0.00248897	0.00249621	16651	420	112555632	372173	2607	0.00330657	0.00332973	25690	727
Drosophila mauritiana	14021-0241.01	same sample	58634038	10131	232	0.000172784	0.00017674	459	44	105769377	32779	1337	0.00030991	0.000322551	2594	84
Drosophila melanogaster	BDGP ISO-1	same strain, SRA	75587105	265	144	3.50589e-06	5.41098e-06	14	51	105543079	1544	409	1.46291e-05	1.85043e-05	1028	32
Drosophila mojavensis	15081-1352.22	same sample	63312556	12932	384	0.000204256	0.000210322	604	86	123639405	39822	1614	0.000322082	0.000335136	7486	232
Drosophila murphyi	DKPHETFM01	same sample	80303326	292154	24539	0.00363813	0.00394371	10461	3847	118620863	994934	8031	0.00838751	0.00845522	124601	2138
Drosophila nebulosa	14030-0761.01	same sample	107004089	148840	3060	0.00139097	0.00141957	16883	1703	126234299	233127	5730	0.00184678	0.00189217	24559	1038
Drosophila neocordata	14041-0831.00	same sample	112150176	2902	4528	2.5876e-05	6.62505e-05	241	650	103861666	30634	2532	0.00029495	0.000319329	3309	204
Drosophila obscura	BZ-5	same sample	49613088	392546	1651	0.00791215	0.00794542	19951	1863	119928681	842188	7713	0.00702241	0.00708672	123328	3545
Drosophila oshimai	MT-04	same sample	94277082	735680	5022	0.00780338	0.00785665	57789	7767	114265012	1338308	8233	0.0117123	0.0117844	92348	2503
Drosophila parabipectinata	par2-isoB	same sample	92785723	1690	1376	1.8214e-05	3.30439e-05	107	251	102638315	16197	898	0.000157807	0.000166556	1119	102
Drosophila paulistorum	L06	same sample	125219788	5631	684	4.49689e-05	5.04313e-05	473	395	165074854	20988	1489	0.000127142	0.000136162	3947	232
Drosophila paulistorum	L12	different sample, this study	89473668	62008	4244	0.000693031	0.000740464	6434	138236	133434617	139022	1599194	0.00104187	0.0130267	15651	1055
Drosophila persimilis	14011-0111.01	same sample	54894098	58985	915	0.00107452	0.00109119	2882	149	115903820	155942	4312	0.00134544	0.00138265	23288	541
Drosophila prosaltans	14045-0901.02	same sample	102005759	22246	1149265	0.000218086	0.0114848	2074	102494	119770589	64084	21201	0.000535056	0.00071207	17603	1770
Drosophila pruinosa	iso-A1 l-9	same sample	86612911	24914	47934	0.000287648	0.000841076	1797	6720	111386619	289556	1461	0.00259956	0.00261267	32991	264
Drosophila pseudoananassae nigrens	VT04-31 Hanoi	same sample	82887575	293773	4993	0.00354423	0.00360447	19804	2613	91928374	454439	2858	0.0049434	0.00497449	33516	1172
Drosophila pseudoananassae pseudoananassae	Wau 125	same sample	87072508	173833	2199	0.00199642	0.00202167	12131	667	110955155	318189	1930	0.00286773	0.00288512	21357	22
Drosophila pseudoobscura	14011-0121.94	same sample	56736816	3869	460	6.81921e-05	7.62997e-05	146	68	115552692	23012	2658	0.000199147	0.00022215	3908	157
Drosophila quadrilineata	TMU E-14402	same strain, SRA	92344201	7836	7978	8.48564e-05	0.000171251	61	221	140809728	26959	23666	0.000191457	0.000359528	7480	673
Drosophila repleta	kari30	different sample, SRA	84292847	312578	2015	0.00370824	0.00373214	23492	24605	120219076	33504	721143	0.000278691	0.00627727	9079	911
Drosophila repletoides	ISZ-isoB I-10	same sample	88750232	2528	1285	2.84844e-05	4.29633e-05	183	375	136338669	21647	2341	0.000158774	0.000175944	3951	333
Drosophila rhopaloa	14029-0021.01	same strain, SRA	90693909	228646	132740	0.00252107	0.00398468	13726	13293	123107517	916725	8225	0.00744654	0.00751335	59393	736
Drosophila rufa	EH091 iso-C L_3	same sample	109459481	2159	2479	1.97242e-05	4.23718e-05	114	593	130846546	30958	1545	0.000236598	0.000248405	1755	93
Drosophila saltans	14045-0911.00	same sample	115854344	32323	2161	0.000278997	0.00029765	2849	739	130641884	62931	2623	0.000481706	0.000501784	6262	349
Drosophila sechellia	14021-0248.01	same sample	52135209	875	182	1.67833e-05	2.02742e-05	27	25	105252084	12989	2606	0.000123408	0.000148168	2186	235
Drosophila simulans	14021-0251.006	same sample	55473929	21781	208	0.000392635	0.000396384	1046	36	105165076	65340	1246	0.000621309	0.000633157	4492	131
Drosophila sp. (Sao Tome mushroom)	st01m	none	78599452	506848	1239	0.00644849	0.00646426	41126	1217	NA	NA	NA	NA	NA	NA	NA
Drosophila sp. aff chauvacae	mont_up-71	same sample	98421556	537612	73827	0.00546234	0.00621245	45831	15729	137250664	1966568	25759	0.0143283	0.014516	208340	3577
Drosophila sproati	DKPTOMS02	same sample	48908959	102289	42177	0.00209142	0.00295377	1890	3385	118304792	602934	7026	0.00509645	0.00515584	81928	1813
Drosophila sturtevanti	14043-0871.01	same sample	75085769	362108	1053	0.00482259	0.00483662	30552	849	109948167	485956	5776	0.00441986	0.0044724	58133	1869
Drosophila subobscura	Kusnacht	same strain, SRA	71411673	70191	562	0.000982907	0.000990776	5040	344	70791849	122496	1434	0.00173037	0.00175063	16062	520
Drosophila subpulchrella	L1	different sample, SRA	98661463	143207	4002	0.0014515	0.00149206	8795	102386	136116681	186619	2158779	0.00137102	0.0172308	14228	1470
Drosophila sucinea	14030-0791.01	same sample	102701084	73525	2649	0.000715913	0.000741706	7523	989	101483549	326056	4783	0.0032129	0.00326003	23498	660
Drosophila takahashii	IR98-3 E-12201	same sample	115202900	199562	2068	0.00173227	0.00175022	16802	1940	90821059	293043	2211	0.0032266	0.00325094	14642	449
Drosophila teissieri	CT02	different sample, SRA	91226703	510558	2487	0.00559659	0.00562385	58869	81389	88817060	139742	826453	0.00157337	0.0108785	19363	490
Drosophila teissieri	273.3	different sample, SRA	90416491	235257	22364	0.00260193	0.00284927	29813	88884	88714733	137146	843688	0.00154592	0.011056	19357	474
Drosophila triauraria	14028-0691.9	same sample	56775537	380040	2005	0.00669373	0.00672904	13381	313	130763118	1374763	20931	0.0105134	0.0106735	108299	3658
Drosophila tristis	D2	same sample	72470676	371214	1053	0.00512226	0.00513679	20421	830	87838089	747723	4231	0.00851251	0.00856068	103087	1957
Drosophila tropicalis	14030-0801.00	none	109604578	22991	1478	0.000209763	0.000223248	3016	835	NA	NA	NA	NA	NA	NA	NA
Drosophila varians	CKM15-L1	same sample	75468016	244658	671	0.00324188	0.00325077	16202	447	74856629	269489	2283	0.00360007	0.00363057	24763	923
Drosophila virilis	15010-1051.87	same sample	59856503	1775	251	2.96543e-05	3.38476e-05	48	46	126464657	10916	1535	8.63166e-05	9.84544e-05	3444	118
Drosophila willistoni	14030-0811.00	same sample	70828249	136871	1916	0.00193244	0.00195949	9314	315	135727596	443245	7155	0.0032657	0.00331841	60727	1524
Drosophila willistoni	14030-0811.17	same sample	102227349	23772	1247	0.000232541	0.000244739	2261	343	115594010	38751	1134	0.000335234	0.000345044	5927	301
Drosophila yakuba	14021-0261.01	same sample	44032428	2550	297	5.79119e-05	6.46569e-05	57	58	108010234	15451	2599	0.000143051	0.000167114	2084	74
Leucophenga varia	nc01v	none	102734709	790680	3547	0.00769633	0.00773085	65747	3122	NA	NA	NA	NA	NA	NA	NA
Lordiphosa clarofinis	Guizhou062018LC	same sample	174000921	1040895	16325	0.00598212	0.00607594	63204	20951	135873945	1557429	9571	0.0114623	0.0115327	117663	3019
Lordiphosa collinella	UCKTSapporo052019LC	same sample	145163177	372709	16201	0.00256752	0.00267912	11626	21603	208039354	3753059	18675	0.0180401	0.0181299	189942	3276
Lordiphosa magnipectinata	UCKTSapporo052019LM	same sample	123696138	281963	35867	0.00227948	0.00256944	5873	5860	240338902	5000414	12980	0.0208057	0.0208597	285863	3317
Lordiphosa mommai	MMSapporo052014LM	same sample	115764806	269638	9227	0.00232919	0.00240889	6736	8900	188924936	2692687	21674	0.0142527	0.0143674	184160	4373
Lordiphosa stackelbergi	UCILTSSapporo052019LS	same sample	84193400	174601	8465	0.00207381	0.00217435	3729	4226	137424008	2697500	16766	0.019629	0.019751	118428	2452
Scaptomyza graminum	TMU-2019	same sample	88848478	177431	25774	0.00199701	0.0022871	6889	7478	91904912	726356	7116	0.00790334	0.00798077	94119	1460
Scaptomyza hsui	iso-CA-L1	same sample	109130993	672026	5169	0.00615798	0.00620534	39319	3944	118309311	1553560	7387	0.0131313	0.0131938	146938	3207
Scaptomyza montana	iso-CA-L1	same sample	118107052	465482	4959	0.00394119	0.00398317	27068	5738	125401552	1125542	4675	0.0089755	0.00901278	92109	1926
Scaptomyza pallida	iso-CA-L1	same sample	106055029	755882	5259	0.00712726	0.00717685	59042	10793	115965931	1138642	10091	0.00981876	0.00990578	104990	2946
Zaprionus africanus	BS06	same sample	90401765	529036	55235	0.00585205	0.00646305	41444	7305	104216058	1045427	15321	0.0100313	0.0101784	64605	1417
Zaprionus camerounensis	jd01cam	same sample	90486896	71571	908	0.000790954	0.000800989	6551	701	87305206	195894	2158	0.00224378	0.0022685	21330	612
Zaprionus capensis	jd01cap	same sample	107462053	105135	1358	0.000978345	0.000990982	11075	772	114854841	180286	1074	0.00156969	0.00157904	14208	222
Zaprionus davidi	jd01d	same sample	87806857	122836	744	0.00139893	0.00140741	10660	393	122259677	377748	1660	0.00308972	0.0031033	34118	486
Zaprionus gabonicus	jd01gab	same sample	107114762	37911	1138	0.000353929	0.000364553	3502	396	122437520	91349	1789	0.000746087	0.000760698	8585	235
Zaprionus ghesquierei	jd01ghe	same sample	92836101	449442	25991	0.00484124	0.00512121	28606	3621	135521186	1405713	13636	0.0103726	0.0104733	146938	3825
Zaprionus indianus	CDD18	same sample	87703464	931452	258515	0.0106205	0.0135681	56991	21048	103183283	1628133	30682	0.015779	0.0160764	131136	2724
Zaprionus indianus	BS02	different sample, this study	95589080	628737	2870	0.0065775	0.00660752	50818	35210	NA	NA	NA	NA	NA	NA	NA
Zaprionus indianus	RCR04	same sample	95142712	335320	1516	0.00352439	0.00354032	27192	966	127680444	774760	5517	0.00606796	0.00611117	58260	1352
Zaprionus indianus	16GNV01	same sample	25838755	123148	608	0.00476602	0.00478955	1938	111	119626820	1447919	18095	0.0121036	0.0122549	128167	4039
Zaprionus inermis	18BSZ10	same sample	93496234	180028	2239	0.00192551	0.00194946	15200	1083	99894620	222611	1907	0.00222846	0.00224755	24786	568
Zaprionus kolodkinae	jd01k	same sample	106212875	257343	1472	0.0024229	0.00243676	36235	1042	115460723	380379	5557	0.00329444	0.00334257	39309	850
Zaprionus lachaisei	jd01l	none	96087094	1859	679	1.9347e-05	2.64135e-05	197	355	NA	NA	NA	NA	NA	NA	NA
Zaprionus nigranus	st01n	same sample	24296907	1173	150989	4.82777e-05	0.00626261	39	56976	107771374	79004	1155302	0.00073307	0.011453	212879	221141
Zaprionus ornatus	jd01o	same sample	107203438	125984	3515	0.00117519	0.00120797	10991	848	140294123	486215	2877	0.00346568	0.00348619	39358	925
Zaprionus taronus	st01t	none	94931451	524953	1588	0.00552981	0.00554654	48108	2839	NA	NA	NA	NA	NA	NA	NA
Zaprionus tsacasi	jd01t	same sample	88989719	499007	6314	0.00560747	0.00567842	44190	4423	107553477	1655942	12153	0.0153965	0.0155094	194617	3444
Zaprionus tsacasi	car7-4	same sample	86548948	424346	4844	0.00490296	0.00495893	39212	2375	105984250	919167	8276	0.00867268	0.00875076	100620	1840
Zaprionus vittiger	jd01v	same sample	90754255	51829	758	0.000571092	0.000579444	3786	273	118688794	182809	3000	0.00154024	0.00156551	18173	616
