# Supplementary material for: Highly contiguous assemblies of 101 drosophilid genomes
Source: eLife journal article supplement (doi:10.7554/elife.66405), 2021-07-19
Supplement: supp [file elife_poa_e66405_Supplementary_file_4.xlsx]

## Sheet: Table S4
species	strain	short read source	Merqury QV (genome-wide)	QV from long read variants (repeats excluded)	QV from short read variants (repeats excluded)
Chymomyza costata	Sapporo	same strain	29.9576	23.6227	22.032
Drosophila ambigua	R42	same sample	32.486	22.2558	19.8588
Drosophila americana	15010-0951.00	same sample	27.6073	27.3836	24.9132
Drosophila ananassae	14024-0371.13	same sample	35.84	44.1305	38.2984
Drosophila arawakana	15182-2261.03	same sample	24.81	24.6554	21.5236
Drosophila biarmipes	14023-0361.10	same strain	31.87	20.1342	33.6874
Drosophila bipectinata	14024-0381.04	same sample	39.6948	29.8252	26.846
Drosophila bocqueti	YAK3_mont-66	same sample	30.378	21.3338	18.0013
Drosophila cardini	15181-2181.03	same sample	29.1176	26.8447	25.0915
Drosophila carrolli	KB866	same sample	31.2887	24.0708	24.0051
Drosophila dunni	15182-2291.00	same sample	30.0203	27.4755	25.9555
Drosophila elegans	14027-0461.03 (modENCODE)	same strain	36.4282	39.8551	28.7238
Drosophila equinoxialis	14030-0741.00	none	NA	27.1623	NA
Drosophila ercepeae	14024-0432.00	same strain	32.4404	20.5484	31.0455
Drosophila erecta	14021-0224.01	same sample	37.2667	46.7766	38.8035
Drosophila eugracilis	14026-0451.02	same sample	27.8318	21.0026	21.1116
Drosophila ficusphila	14025-0441.05 (modENCODE)	same strain	22.5331	35.5385	31.0398
Drosophila funebris	fst01	none	NA	48.1426	NA
Drosophila fuyamai	KB-1217	same sample	32.9811	27.1842	26.9418
Drosophila grimshawi	15287-2541.00 (caf1)	same strain	31.863	24.8277	25.9967
Drosophila immigrans	15111.1731.12	same sample	33.8582	26.9445	26.1603
Drosophila immigrans	kari17	different strain	21.0751	22.3719	19.1416
Drosophila insularis	jp01i	same sample	36.9194	38.1238	31.7891
Drosophila jambulina	14028-0671.01	same sample	37.1669	34.5737	25.6605
Drosophila kikkawai	14028-0561.14 (modENCODE)	same strain	35.3205	45.4969	42.5811
Drosophila kurseongensis	SaPa58	same sample	31.1869	23.872	23.3842
Drosophila littoralis	Kilpisjärvi 1	same sample	33.3308	25.3873	25.209
Drosophila malerkotliana malerkotliana	mal0-isoC	same sample	32.6829	35.0061	29.5714
Drosophila malerkotliana pallens	palQ-isoG	same sample	34.1743	25.7133	24.488
Drosophila mauritiana	14021-0241.01	same sample	36.0863	37.3208	34.5958
Drosophila melanogaster	BDGP ISO-1	same strain	36.9642	52.0267	45.4907
Drosophila mojavensis	15081-1352.22	same sample	38.7244	36.5518	34.0265
Drosophila murphyi	DKPHETFM01	same sample	24.2886	23.849	20.2202
Drosophila nebulosa	14030-0761.01	same sample	33.18	27.9771	26.8054
Drosophila neocordata	14041-0831.00	same sample	26.7945	41.2962	34.5446
Drosophila obscura	BZ-5	same sample	30.3695	20.7649	20.9071
Drosophila oshimai	MT-04	same sample	27.2301	20.6793	18.9989
Drosophila parabipectinata	par2-isoB	same sample	32.6212	44.3295	37.509
Drosophila paulistorum	L06	same sample	37.6279	42.4137	37.9568
Drosophila paulistorum	L12	different strain	20.5261	26.2757	18.8127
Drosophila persimilis	14011-0111.01	same sample	34.7282	29.4066	28.0036
Drosophila prosaltans	14045-0901.02	same sample	26.7714	19.0275	30.6599
Drosophila pruinosa	iso-A1 l-9	same sample	34.2311	30.2715	25.3628
Drosophila pseudoananassae nigrens	VT04-31 Hanoi	same sample	30.6221	24.1174	22.7253
Drosophila pseudoananassae pseudoananassae	Wau 125	same sample	37.6089	26.6381	25.1179
Drosophila pseudoobscura	14011-0121.94	same sample	36.4477	40.9652	35.9181
Drosophila quadrilineata	TMU E-14402	same strain	30.3833	37.5869	33.8442
Drosophila repleta	kari30	different strain	23.0227	23.6626	21.9704
Drosophila repletoides	ISZ-isoB I-10	same sample	36.9425	43.0759	36.8841
Drosophila rhopaloa	14029-0021.01 (modENCODE)	same strain	34.6961	23.6829	20.9714
Drosophila rufa	EH091 iso-C L_3	same sample	39.0499	43.1131	35.82
Drosophila saltans	14045-0911.00	same sample	31.0822	34.8331	32.5986
Drosophila sechellia	14021-0248.01	same sample	33.6055	46.722	37.7227
Drosophila simulans	14021-0251.006	same sample	34.6505	33.8102	31.7014
Drosophila sp. (Sao Tome mushroom)	st01m	none	NA	21.5472	NA
Drosophila sp. aff chauvacae	mont_up-71	same sample	29.4421	21.6508	17.9496
Drosophila sproati	DKPTOMS02	same sample	24.5685	25.1405	22.3297
Drosophila sturtevanti	14043-0871.01	same sample	30.2444	22.7944	23.0093
Drosophila subobscura	Kusnacht	same strain	38.7314	29.7217	27.0388
Drosophila subpulchrella	L1	different strain	22.3713	25.8187	17.6107
Drosophila sucinea	14030-0791.01	same sample	33.107	30.8376	24.5698
Drosophila takahashii	IR98-3 E-12201	same sample	32.8478	27.1831	24.6697
Drosophila teissieri	CT02	different strain	20.1569	21.4501	19.5481
Drosophila teissieri	273.3	different strain	20.2434	23.8069	19.4791
Drosophila triauraria	14028-0691.9	same sample	26.8159	21.5675	19.3924
Drosophila tristis	D2	same sample	31.8569	22.652	20.117
Drosophila tropicalis	14030-0801.00	none	NA	35.8774	NA
Drosophila varians	CKM15-L1	same sample	33.2682	24.595	24.0215
Drosophila virilis	15010-1051.87	same sample	33.9212	44.5078	39.0071
Drosophila willistoni	14030-0811.00	same sample	32.4428	26.7873	24.2414
Drosophila willistoni	14030-0811.17	same sample	33.0551	35.683	34.0196
Drosophila yakuba	14021-0261.01	same sample	34.2378	41.7219	37.2953
Leucophenga varia	nc01v	none	NA	20.7566	NA
Lordiphosa clarofinis	Guizhou062018LC	same sample	28.6906	21.8312	19.0662
Lordiphosa collinella	UCKTSapporo052019LC	same sample	25.1666	25.364	17.2027
Lordiphosa magnipectinata	UCKTSapporo052019LM	same sample	26.1945	25.7442	16.5661
Lordiphosa mommai	MMSapporo052014LM	same sample	24.45	25.9449	18.1411
Lordiphosa stackelbergi	UCILTSSapporo052019LS	same sample	22.6003	26.442	16.8586
Scaptomyza graminum	TMU-2019	same sample	31.2818	26.1105	20.4552
Scaptomyza hsui	iso-CA-L1	same sample	30.9833	21.8034	18.4056
Scaptomyza montana	iso-CA-L1	same sample	29.9358	23.7049	20.1112
Scaptomyza pallida	iso-CA-L1	same sample	29.7617	21.0594	19.6613
Zaprionus africanus	BS06	same sample	25.8423	21.5476	19.6665
Zaprionus camerounensis	jd01cam	same sample	37.4516	30.5496	25.9984
Zaprionus capensis	jd01cap	same sample	32.5879	29.5812	27.6885
Zaprionus davidi	jd01d	same sample	34.3095	28.1438	24.7078
Zaprionus gabonicus	jd01gab	same sample	34.2624	33.9692	30.805
Zaprionus ghesquierei	jd01ghe	same sample	33.0342	22.6214	19.3714
Zaprionus indianus	CDD18	same sample	23.6113	18.399	17.6077
Zaprionus indianus	BS02	different strain	21.0693	21.245	NA
Zaprionus indianus	RCR04	same sample	31.515	24.1609	21.826
Zaprionus indianus	16GNV01	same sample	27.4925	23.1257	18.7529
Zaprionus inermis	18BSZ10	same sample	31.3856	26.7292	26.0281
Zaprionus kolodkinae	jd01k	same sample	32.2289	25.5475	24.338
Zaprionus lachaisei	jd01l	none	NA	44.9271	NA
Zaprionus nigranus	st01n	same sample	16.2811	20.6504	18.7198
Zaprionus ornatus	jd01o	same sample	38.0952	28.7995	24.2404
Zaprionus taronus	st01t	none	NA	22.1587	NA
Zaprionus tsacasi	jd01t	same sample	31.2298	22.0588	17.6148
Zaprionus tsacasi	car7-4	same sample	29.337	22.6445	20.1322
Zaprionus vittiger	jd01v	same sample	36.3493	32.047	27.6482
