# Supplementary material for: Highly contiguous assemblies of 101 drosophilid genomes
Source: eLife journal article supplement (doi:10.7554/elife.66405), 2021-07-19
Supplement: supp [file elife_poa_e66405_Supplementary_file_6.xlsx]

## Sheet: Table S6
Species	Strain	BioSample #	Development stage	Sex	Tissue	Biomaterial provider	Collected by	Collection date	Geographic location	GPS
Chymomyza costata	Sapporo	SAMN16729672	Adult fly	male	whole fly	Vladimír Košťál	missing	1983	Japan: Sapporo, Hokkaido	missing
Drosophila ambigua	R42	SAMN16729675	Adult fly	male	whole fly	Marina Stamenković-Radak	Marija Savić Veselinović, Bojan Kenig, Marko Anđelković	2014	Serbia: Mt Rtanj	43.766660, 21.933330, 612m
Drosophila americana	15010-0951.00	SAMN16729623	Adult fly	pooled male and female	whole fly	Leonie Moyle	missing	missing	USA: Anderson, Indiana	missing
Drosophila ananassae	14024-0371.13	SAMN16729696	Adult fly	female	whole fly	re-basecalled data from D. Miller
Drosophila arawakana	15182-2261.03	SAMN16729669	Adult fly	male	whole fly	Daniel Matute	missing	2005	St. Kitts: Monkey Hill	missing
Drosophila biarmipes	14023-0361.10	SAMN16729608	Adult fly	pooled male and female	whole fly	Artyom Kopp	missing	1967	Cambodia: Ari Ksatr	missing
Drosophila bipectinata	inbred derivative of strain 14024-0381.04	SAMN16729609	Adult fly	pooled male and female	whole fly	Artyom Kopp	missing	1971	Thailand: Samut Songkhram	missing
Drosophila bocqueti	YAK3_mont-66	SAMN16729647	Adult fly	male	whole fly	Daniel Matute	Brandon Cooper	2018	Sao Tome and Principe: Sao Tome	0.289,6.616
Drosophila cardini	15181-2181.03	SAMN16729652	Adult fly	male	whole fly	Daniel Matute	missing	1958	Brazil: Mogi das Cruzes	missing
Drosophila carrolli	KB866	SAMN16729632	Adult fly	pooled male and female	whole fly	Artyom Kopp	Artyom Kopp and Olga Barmina	2003	Brunei: Kuala Belalong, Ulu Temburong Ntl. Park	missing
Drosophila dunni	15182-2291.00	SAMN16729653	Adult fly	male	whole fly	Daniel Matute	missing	1957	Puerto Rico: Mayaguez	missing
Drosophila elegans	14027-0461.03	SAMN16729630	Adult fly	female	whole fly	Sarah Elgin	obtained from John True, inbred by AK	missing	Hong Kong	missing
Drosophila equinoxialis	14030-0741.00	SAMN16729691	Adult fly	male	whole fly	Daniel Matute	missing	missing	Honduras	missing
Drosophila ercepeae	14024-0432.00	SAMN16729683	Adult fly	pooled male and female	whole fly	Artyom Kopp	missing	Unknown	France: Reunion Island	missing
Drosophila erecta	14021-0224.01	SAMN16729697	Adult fly	female	whole fly	re-basecalled data from D. Miller
Drosophila eugracilis	14026-0451.02	SAMN16729698	Adult fly	female	whole fly	re-basecalled data from D. Miller
Drosophila ficusphila	14025-0441.05	SAMN16729631	Adult fly	female	whole fly	Sarah Elgin	originally obtained from NDSSC, inbred by AK	1961	Taiwan	missing
Drosophila funebris	fst01	SAMN16729688	Adult fly	male	whole fly	Daniel Matute	missing	missing		missing
Drosophila fuyamai	14029-0011.01	SAMN16729615	Adult fly	female	whole fly	Artyom Kopp	Artyom Kopp and Olga Barmina	2003	Brunei: Kuala Belalong, Ulu Temburong Ntl. Park	missing
Drosophila grimshawi	15287-2541.00	SAMN16729613	Adult fly	female	whole fly	Don Price	missing	missing		missing
Drosophila immigrans	15111.1731.12	SAMN16729612	Adult fly	female	whole fly	Artyom Kopp	missing	2005	Japan: Fukui City	missing
Drosophila immigrans	kari17	SAMN16729649	Adult fly	male	whole fly	Daniel Matute	Daniel Matute	2017	Kenya	missing
Drosophila insularis	jp01i	SAMN16729645	Adult fly	male	whole fly	Daniel Matute	J. Powell	missing		missing
Drosophila jambulina	14028-0671.01	SAMN16729634	Adult fly	pooled male and female	whole fly	Artyom Kopp	missing	missing	Pakistan: Islamabad	missing
Drosophila kikkawai	14028-0561.14	SAMN16729629	Adult fly	female	whole fly	Sarah Elgin	originally obtained from NDSSC, inbred by AK	2010	Colombia: Caroline Island, Leticia	missing
Drosophila kurseongensis	SaPa58	SAMN16729614	Adult fly	female	whole fly	Artyom Kopp	Collected by H. Takamori, sent to AK by T. Matsuo	2009	Vietnam: SaPa	missing
Drosophila littoralis	Kilpisjärvi 1	SAMN16729673	Adult fly	male	whole fly	Charlotte Foerster	Pekka Lankinen	1970	Finland: Kilpisjärvi	missing
Drosophila malerkotliana malerkotliana	inbred derivative of strain 14024-0391.00	SAMN16729616	Adult fly	pooled male and female	whole fly	Artyom Kopp	missing	1971	India: Mysore	missing
Drosophila malerkotliana pallens	palQ-isoG	SAMN16729617	Adult fly	female	whole fly	Artyom Kopp	Collected by Yoshiaki Fuyama, sent to AK by Muneo Matsuda	1979	Philippines: Los Banos, Luzon	missing
Drosophila mauritiana	14021-0241.01	SAMN16729699	Adult fly	female	whole fly	re-basecalled data from D. Miller
Drosophila melanogaster	14021-0231.36	SAMN16729610	Adult fly	pooled male and female	whole fly	Scott Hawley	missing	missing		missing
Drosophila mojavensis	15081-1352.22	SAMN16729700	Adult fly	female	whole fly	re-basecalled data from D. Miller
Drosophila murphyi	DKPHETFM01	SAMN16729622	Adult fly	pooled male and female	whole fly	Don Price	Don Price	2018-04-01	USA: Hawaii	19.911621, -155.313161
Drosophila nebulosa	14030-0761.01	SAMN16729679	Adult fly	male	whole fly	Noah Whiteman	missing	1955	Costa Rica: San Jose	missing
Drosophila neocordata	14041-0831.00	SAMN16729666	Adult fly	male	whole fly	Daniel Matute	missing	1959	Brazil: Minas Gerais	missing
Drosophila obscura	BZ-5	SAMN16729671	Adult fly	male	whole fly	Marina Stamenković-Radak	Marina Stamenković-Radak, Mihailo Jelić, Marija Tanasković, Marija Savić Veselinović, Aleksandra Patenković, Katarina Erić, Bojan Kenig, Marko Anđelković	2016	Serbia: Babin zub, Mt Stara Planina	43.374260, 22.617300, 1566m
Drosophila oshimai	MT-04	SAMN16729682	Adult fly	male	whole fly	Artyom Kopp	Takehiro Katoh and Masayoshi Watada	2013	Japan: Dogo Park, Matsuyama, Ehime	missing
Drosophila parabipectinata	inbred derivative of strain 14024-0401.02 (now extinct)	SAMN16729611	Adult fly	pooled male and female	whole fly	Artyom Kopp	missing	1967	Philippines: Tagaytay	missing
Drosophila paulistorum	14030-0771.06	SAMN16729646	Adult fly	male	whole fly	Daniel Matute	missing	1955	El Salvador	missing
Drosophila paulistorum (L12)	14030-0771.12	SAMN16729664	Adult fly	male	whole fly	Daniel Matute	missing	missing	Brazil	missing
Drosophila persimilis	14011-0111.01	SAMN16729701	Adult fly	female	whole fly	re-basecalled data from D. Miller
Drosophila prosaltans	14045-0901.02	SAMN16729667	Adult fly	male	whole fly	Daniel Matute	missing	1953	El Salvador	missing
Drosophila pruinosa	iso-A1 l-9	SAMN16729676	Adult fly	male	whole fly	Artyom Kopp	inbred derivative of strain obtained from Jean-Robert David	missing	Cameroon ?	missing
Drosophila pseudoananassae nigrens	VT04-31	SAMN16729618	Adult fly	female	whole fly	Artyom Kopp	Sent to AK by Muneo Matsuda	2004?	Vietnam: Hanoi	missing
Drosophila pseudoananassae pseudoananassae	Wau 125	SAMN16729620	Adult fly	female	whole fly	Artyom Kopp	Collected by Yoshiaki Fuyama, sent to AK by Muneo Matsuda	1981	Papua New Guinea: Wau	missing
Drosophila pseudoobscura	14011-0121.94	SAMN16729702	Adult fly	female	whole fly	re-basecalled data from D. Miller
Drosophila quadrilineata	quad-TMU	SAMN16729680	Adult fly	male	whole fly	Artyom Kopp	missing	missing		missing
Drosophila repleta	kari30	SAMN16729650	Adult fly	male	whole fly	Daniel Matute	Daniel Matute	2017	Kenya	missing
Drosophila repletoides	ISZ-isoB I-10	SAMN16729677	Adult fly	male	whole fly	Artyom Kopp	inbred derivative of strain obtained from M. Watada	missing		missing
Drosophila rhopaloa	14029-0021.01	SAMN16729633	Adult fly	pooled male and female	whole fly	Artyom Kopp	Hisaki Takamori	2004	Vietnam: BaVi	missing
Drosophila rufa	inbred derivative of Ehime stock EH091	SAMN16729619	Adult fly	female	whole fly	Artyom Kopp	missing	1991	Japan: Ehime	missing
Drosophila saltans	14045-0911.00	SAMN16729668	Adult fly	male	whole fly	Daniel Matute	missing	1956	Costa RIca	missing
Drosophila sechellia	14021-0248.01	SAMN16729703	Adult fly	female	whole fly	re-basecalled data from D. Miller
Drosophila simulans	14021-0251.006	SAMN16729704	Adult fly	female	whole fly	re-basecalled data from D. Miller
Drosophila sp. (Sao Tome Mushroom)	st01m	SAMN16729694	Adult fly	male	whole fly	Daniel Matute	Daniel Matute	2018	Sao Tome and Principe: Sao Tome	0.282,6.593
Drosophila sp. aff chauvacae	mont_up-71	SAMN16729648	Adult fly	male	whole fly	Daniel Matute	Daniel Matute	2018	Sao Tome and Principe: Sao Tome	0.284,6.598
Drosophila sproati	DKPTOMS02	SAMN16729621	Adult fly	pooled male and female	whole fly	Don Price	Don Price	2019-06-01	USA: Waiakea Forest Reserve, Hawaii	19.574513, -155.216191
Drosophila sturtevanti	14043-0871.01	SAMN16729685	Adult fly	female	whole fly	Danny Miller	missing	1956	Colombia: Bucamaranga	missing
Drosophila subobscura	Kusnacht	SAMN16729670	Adult fly	male	whole fly	Marina Stamenković-Radak	missing	Unknown, <1953	Switzerland: Küsnacht	missing
Drosophila subpulchrella	L1	SAMN16729695	Adult fly	male	whole fly	Daniel Matute	Brandon Cooper	missing		missing
Drosophila sucinea	14030-0791.01	SAMN16729678	Adult fly	male	whole fly	Noah Whiteman	missing	1954	Honduras: Monte Ceyuca	missing
Drosophila takahashii	inbred derivative of Ehime stock IR98-3	SAMN16729628	Adult fly	female	whole fly	Sarah Elgin	originally obtained from Ehime, inbred by AK	1998	Japan: Okinawa	missing
Drosophila teissieri	CT02	SAMN16729661	Adult fly	male	whole fly	Daniel Matute	missing	missing	Cameroon	missing
Drosophila teissieri	273.3	SAMN16729662	Adult fly	male	whole fly	Daniel Matute	J. David	missing	Cameroon	missing
Drosophila triauraria	14028-0691.9	SAMN16744625	Adult fly	female	whole fly	re-basecalled data from D. Miller
Drosophila tristis	D2	SAMN16729674	Adult fly	male	whole fly	Marina Stamenković-Radak	Marina Stamenković-Radak	2019	Serbia, Divčibare, Mt Maljen	44.105109, 19.982379, 978m
Drosophila tropicalis	14030-0801.00	SAMN16729692	Adult fly	male	whole fly	Daniel Matute	missing	1955	El Salvador	missing
Drosophila varians	CKM15-L1	SAMN16729684	Adult fly	pooled male and female	whole fly	Artyom Kopp	sent to AK by M. Matsuda	missing		missing
Drosophila virilis	15010-1051.87	SAMN16729705	Adult fly	female	whole fly	re-basecalled data from D. Miller
Drosophila willistoni	14030-0811.17	SAMN16729681	Adult fly	male	whole fly	Noah Whiteman	missing	missing	Uruguay	missing
Drosophila willistoni	14030-0811.00	SAMN16729706	Adult fly	female	whole fly	re-basecalled data from D. Miller
Drosophila yakuba	14021-0261.01	SAMN16729707	Adult fly	female	whole fly	re-basecalled data from D. Miller
Leucophenga varia	nc01v	SAMN16729689	Adult fly	male	whole fly	Daniel Matute	Aaron Comeault	2018	USA: North Carolina	35.922,-79.061
Lordiphosa clarofinis	Guizhou062018LC	SAMN16729635	Adult fly	pooled male and female	whole fly	Artyom Kopp	Jian-jun Gao	2019	China: Longhua Town, Pingshan County, Sichuan Province	missing
Lordiphosa collinella	UCKTSapporo052019LC	SAMN16729637	Adult fly	pooled male and female	whole fly	Artyom Kopp	Hideaki Watabe and Masanori Toda	2019	Sapporo, Hokkaido, Japan	missing
Lordiphosa magnipectinata	UCKTSapporo052019LM	SAMN16729636	Adult fly	pooled male and female	whole fly	Artyom Kopp	Hideaki Watabe and Masanori Toda	2019	Sapporo, Hokkaido, Japan	missing
Lordiphosa mommai	MMSapporo052014LM	SAMN16729639	Adult fly	pooled male and female	whole fly	Artyom Kopp	Hideaki Watabe and Masanori Toda	2019	Sapporo, Hokkaido, Japan	missing
Lordiphosa stackelbergi	UCILTSSapporo052019LS	SAMN16729638	Adult fly	pooled male and female	whole fly	Artyom Kopp	Hideaki Watabe and Masanori Toda	2019	Sapporo, Hokkaido, Japan	missing
Scaptomyza graminum	TMU-2019	SAMN16729627	Adult fly	female	whole fly	Aya Takahashi	Aya Takahashi	2019-11-01	Japan: Minami-osawa, Hachioji-shi, Tokyo	35.600000, 139.400000
Scaptomyza hsui	iso-CA-L1	SAMN16729625	Adult fly	pooled male and female	whole fly	Noah Whiteman	missing	missing		missing
Scaptomyza montana	iso-CA-L1	SAMN16729626	Adult fly	pooled male and female	whole fly	Noah Whiteman	missing	missing		missing
Scaptomyza pallida	iso-CA-L1	SAMN16729624	Adult fly	pooled male and female	whole fly	Noah Whiteman	missing	missing		missing
Zaprionus africanus	BS06	SAMN16729659	Adult fly	male	whole fly	Daniel Matute	Aaron Comeault	2018	Senegal	0.289,6.612
Zaprionus camerounensis	jd01cam	SAMN16729640	Adult fly	male	whole fly	Daniel Matute	missing	missing		missing
Zaprionus capensis	jd01cap	SAMN16729656	Adult fly	male	whole fly	Daniel Matute	missing	missing		missing
Zaprionus davidi	jd01d	SAMN16729654	Adult fly	male	whole fly	Daniel Matute	missing	missing		missing
Zaprionus gabonicus	jd01gab	SAMN16729655	Adult fly	male	whole fly	Daniel Matute	missing	missing		missing
Zaprionus ghesquierei	jd01ghe	SAMN16729642	Adult fly	male	whole fly	Daniel Matute	missing	missing		missing
Zaprionus indianus	CDD18	SAMN16729658	Adult fly	male	whole fly	Daniel Matute	Aaron Comeault	2018	Senegal	15.457,-16.670
Zaprionus indianus	BS02	SAMN16729663	Adult fly	male	whole fly	Daniel Matute	Aaron Comeault	2018	Sao Tome and Principe: Sao Tome	0.289,6.612
Zaprionus indianus	RCR04	SAMN16729665	Adult fly	male	whole fly	Daniel Matute	Aaron Comeault	2017	USA: New York	35.922,-79.061
Zaprionus indianus	16GNV01	SAMN16729687	Adult fly	male	whole fly	Daniel Matute	Aaron Comeault	2016	USA: Florida	29.656,-82.325
Zaprionus inermis	18BSZ10	SAMN16729651	Adult fly	male	whole fly	Daniel Matute	Aaron Comeault	2018	Sao Tome and Principe: Sao Tome	0.289,6.612
Zaprionus kolodkinae	jd01k	SAMN16729657	Adult fly	male	whole fly	Daniel Matute	missing	missing		missing
Zaprionus lachaisei	jd01l	SAMN16729690	Adult fly	male	whole fly	Daniel Matute	missing	missing		missing
Zaprionus nigranus	st01n	SAMN16729686	Adult fly	male	whole fly	Daniel Matute	missing	2019	Sao Tome and Principe: Sao Tome	missing
Zaprionus ornatus	jd01o	SAMN16729644	Adult fly	male	whole fly	Daniel Matute	missing	missing	Mayotte	missing
Zaprionus taronus	st01t	SAMN16729693	Adult fly	male	whole fly	Daniel Matute	missing	2018	Sao Tome and Principe: Sao Tome	0.284,6.598
Zaprionus tsacasi	jd01t	SAMN16729641	Adult fly	male	whole fly	Daniel Matute	missing	missing		missing
Zaprionus tsacasi	car7-4	SAMN16729660	Adult fly	male	whole fly	Daniel Matute	Aaron Comeault	2018	Sao Tome and Principe: Sao Tome	0.279,6.594
Zaprionus vittiger	jd01v	SAMN16729643	Adult fly	male	whole fly	Daniel Matute	missing	missing		missing
