# Supplementary material for: Highly contiguous assemblies of 101 drosophilid genomes
Source: eLife. 2021 Jul 19;10:e66405. doi: 10.7554/eLife.66405 (PMC8337076; doi:10.7554/eLife.66405)
Supplement: Supplementary file 1. [file elife-66405-supp1.xlsx]

## Sheet: Table S1
	Sample information			Nanopore read information				Short read information
Species	internal strain/sample designation	provided by	prepared and sequenced by	Sex	Flow cell	Basecaller	Base pairs pass Q=7 (Gb)	data source	sex	accession (if previously released)	method	number of read pairs	Amount of data (Gbp)
Chymomyza costata	Sapporo	Flies provided by V. Košťál	Bernard Kim	M	R9.4.1	Guppy 3.2.4+HAC	24.4	Downloaded from SRA	M	DRR061005	2x150 PE, Illumina HiSeq 2500	149663622	44.8991
Drosophila ambigua	R42	Flies provided by M. Stamenković-Radak	Bernard Kim	M	R9.4.1	Guppy 3.2.4+HAC	8.4	sequenced by Admera	M	NA	2x150 PE, Illumina HiSeq 4000	43669359	13.1008
Drosophila americana	Anderson	Flies provided by L. Moyle	Danny Miller/Bernard Kim	M	R9.4.1	Guppy 3.2.4+HAC	13.5	sequenced by Admera	M	NA	2x150 PE, HiSeq 4000	37640644	11.2922
Drosophila ananassae	14024-0371.13	Raw reads from D. Miller	Danny Miller	F	R9.4.1	Guppy 3.0.3+HAC	8.12	Miller et al. 2018, SRA	M	SRR6425991	2x150 PE, HiSeq 2000	23594251	7.07828
Drosophila arawakana	15182-2261.03	Flies provided by D. Matute	Jeremy Wang	M	R9.4.1	GridION + HAC	14.4	sequenced by Admera	M	NA	2x150 PE, Illumina HiSeq 4000	37518977	11.2557
Drosophila biarmipes	361.0 iso1 l-11	Flies provided by A. Kopp	Bernard Kim	MF	R10	Guppy 3.2.2+HAC	12.8	modENCODE, SRA	F (?)	SRR345536	2x125 PE, Genome Analyzer IIx	31659664	7.91492
Drosophila bipectinata	4-4-2-3-1-1-1-1-1 BackUp	Flies provided by A. Kopp	Bernard Kim	MF	R9.4.1	Guppy 3.2.2+HAC	13.9	sequenced by Admera	M	NA	2x150 PE, HiSeq 4000	38896533	11.669
Drosophila bocqueti	YAK3_mont-66	Flies provided by D. Matute	Jeremy Wang	M	R9.4.1	Guppy 3.2.4+HAC	4.9	sequenced by UNC core	M	NA	2x150 PE, Illumina HiSeq 4000	51729400	15.5188
Drosophila cardini	15181-2181.03	Flies provided by D. Matute	Jeremy Wang	M	R9.4.1	Guppy 3.2.4+HAC	6.9	sequenced by Admera	M	NA	2x150 PE, Illumina HiSeq 4000	38607838	11.5824
Drosophila carrolli	KB866	Flies provided by A. Kopp	Bernard Kim/Jeremy Wang	MF	R9.4.1	Guppy 3.2.2+HAC	15.4	sequenced by Admera	M	NA	2x150 PE, Illumina HiSeq 4000	32632468	9.78974
Drosophila dunni	15182-2291.00	Flies provided by D. Matute	Jeremy Wang	M	R9.4.1	Guppy 3.2.4+HAC	9.1	sequenced by Admera	M	NA	2x150 PE, Illumina HiSeq 4000	28673854	8.60216
Drosophila elegans	14027-0461.03 (modENCODE)	Flies provided by S. Elgin	Bernard Kim	F	R9.4.1	Guppy 3.0.3+HAC	10.5	modENCODE, SRA	F (?)	SRR345540	2x125 PE, Genome Analyzer IIx	35095287	8.77382
Drosophila equinoxialis	14030-0741.00	Flies provided by D. Matute	Jeremy Wang	M	R9.4.1	GridION + HAC	10.3	no data
Drosophila ercepeae	14024-0432.00	Flies provided by A. Kopp	Bernard Kim	MF	R9.4.1	Guppy 3.2.4+HAC	9.1	Downloaded from SRA	M	SRR9426092	2x100 PE, Illumina HiSeq 2500	46874866	9.37497
Drosophila erecta	14021-0224.01	Raw reads from D. Miller	Danny Miller	F	R9.4.1	Guppy 3.0.3+HAC	5.05	Miller et al. 2018, SRA	M	SRR6425990	2x150 PE, HiSeq 2000	23594251	7.07828
Drosophila eugracilis	14026-0451.02	Raw reads from D. Miller	Danny Miller	F	R9.4.1	Guppy 3.0.3+HAC	5.05	Miller et al. 2018, SRA	M	SRR6425995	2x150 PE, HiSeq 2000	47933100	14.3799
Drosophila ficusphila	14025-0441.05 (modENCODE)	Flies provided by S. Elgin	Bernard Kim	F	R9.4.1	Guppy 3.0.3+HAC	8.22	modENCODE, SRA	F (?)	SRR345541	2x125 PE, Genome Analyzer IIx	31825159	7.95629
Drosophila funebris	fst01	Flies provided by D. Matute	Jeremy Wang	M	R9.4.1	Guppy 3.2.4+HAC	10.1	no data
Drosophila fuyamai	KB-1217	Flies provided by A. Kopp	Bernard Kim	F	R9.4.1	Guppy 3.1.5+HAC	12.34	sequenced by Admera	F	NA	2x150 PE, HiSeq 4000	53988311	16.1965
Drosophila grimshawi	15287-2541.00 (caf1)	Flies provided by D. Price	Danny Miller	F	R9.4.1	Guppy 3.0.3+HAC	14.46	Downloaded from SRA	MF	SRR7642854,SRR7642855	1x75 SE, HiSeq 2000	44279214	3.32094
Drosophila immigrans	15111.1731.12	Flies provided by A. Kopp	Bernard Kim	F	R9.4.1	Guppy 3.0.3+HAC	18.67	sequenced by Admera	F	NA	2x150 PE, NextSeq 550	33452641	10.0358
Drosophila immigrans	kari17	Flies provided by D. Matute	Jeremy Wang	M	R9.4.1	Guppy 3.2.4+HAC	8.2	15111.1731.12 (our data, diff. strain)	F	NA	2x150 PE (diff. strain), no SNV	33452641	10.0358
Drosophila insularis	jp01i	Flies provided by D. Matute	Jeremy Wang	M	R9.4.1	Guppy 3.2.4+HAC	7.7	sequenced by UNC core	M	NA	2x150 PE, Illumina HiSeq 4000	59721982	17.9166
Drosophila jambulina	14028-0671.01	Flies provided by A. Kopp	Bernard Kim	MF	R9.4.1	Guppy 3.2.2+HAC	12.1	SRA/Kopp lab	F	SRR9997925	2x150 PE, Illumina HiSeq 2000	29920035	8.97601
Drosophila kikkawai	14028-0561.14 (modENCODE)	Flies provided by S. Elgin	Bernard Kim	F	R9.4.1	Guppy 3.0.3+HAC	13.84	modENCODE, SRA	F (?)	SRR345537	2x125 PE, Genome Analyzer IIx	29873110	7.46828
Drosophila kurseongensis	SaPa58	Flies provided by A. Kopp	Bernard Kim	F	R9.4.1	Guppy 3.1.5+HAC	12.42	sequenced by Admera	MF	NA	2x150 PE, HiSeq 4000	25955845	7.78675
Drosophila littoralis	Kilpisjärvi 1	Flies provided by C. Foerster	Bernard Kim	M	R9.4.1	Guppy 3.2.4+HAC	10	sequenced by Admera	M	NA	2x150 PE, Illumina HiSeq 4000	46136649	13.841
Drosophila m. malerkotliana	mal0-isoC	Flies provided by A. Kopp	Bernard Kim	MF	R9.4.1	Guppy 3.1.5+HAC	9.69	sequenced by Admera	M	NA	2x150 PE, HiSeq 4000	29860053	8.95802
Drosophila m. pallens	palQ-isoG	Flies provided by A. Kopp	Bernard Kim	F	R9.4.1	Guppy 3.1.5+HAC	11.2	sequenced by Admera	MF	NA	2x150 PE, HiSeq 4000	46355753	13.9067
Drosophila mauritiana	14021-0241.01	Raw reads from D. Miller	Danny Miller	F	R9.4.1	Guppy 3.1.5+HAC	4.9	Miller et al. 2018, SRA	M	SRR6425993	2x150 PE, HiSeq 2000	28572200	8.57166
Drosophila melanogaster	BDGP ISO-1	Flies provided by S. Hawley	Bernard Kim	MF	R9.4.1	Guppy 3.2.2+HAC	8.5	Solares et al. 2018, SRA	MF	SRR6702604	2x150 PE, NextSeq 500	20619401	6.18582
Drosophila mojavensis	15081-1352.22	Raw reads from D. Miller	Danny Miller	F	R9.4.1	Guppy 3.1.5+HAC	7.25	Miller et al. 2018, SRA	M	SRR6425997	2x150 PE, HiSeq 2000	41223992	12.3672
Drosophila murphyi	DKPHETFM01	Flies provided by D. Price	Bernard Kim	MF	R9.4.1	Guppy 3.2.4+HAC	10	from Ellie Armstrong/Don Price	M	PRJNA593822	2x100 PE, ?	45588931	9.11779
Drosophila mush-saotome	st01m	Flies provided by D. Matute	Jeremy Wang	M	R9.4.1	Guppy 3.2.4+HAC	8.1	no data
Drosophila sucinea**	14030-0761.01	Flies provided by N. Whiteman	Bernard Kim	M	R9.4.1	Guppy 3.2.4+HAC	7.8	sequenced by Admera	M	NA	2x150 PE, Illumina HiSeq 4000	44781838	13.4346
Drosophila neocordata	14041-0831.00	Flies provided by D. Matute	Jeremy Wang	M	R9.4.1	GridION + HAC	12.5	sequenced by Admera	M	NA	2x150 PE, Illumina HiSeq 4000	32604149	9.78124
Drosophila obscura	BZ-5	Flies provided by M. Stamenković-Radak	Bernard Kim	M	R10	Guppy 3.2.4+HAC	11.1	sequenced by Admera	M	NA	2x150 PE, Illumina HiSeq 4000	34170839	10.2513
Drosophila oshimai	MT-04	Flies provided by T. Katoh and M. Masuta via A. Kopp	Bernard Kim	M	R9.4.1	Guppy 3.2.4+HAC	8.9	sequenced by Admera	M	NA	2x150 PE, Illumina HiSeq 4000	32378651	9.7136
Drosophila p. nigrens	VT04-31 Hanoi	Flies provided by A. Kopp	Bernard Kim	F	R9.4.1	Guppy 3.1.5+HAC	18.6	sequenced by Admera	M	NA	2x150 PE, HiSeq 4000	26761706	8.02851
Drosophila p. pseudoananassae	Wau 125	Flies provided by A. Kopp	Bernard Kim	F	R9.4.1	Guppy 3.0.3+HAC	12.8	sequenced by Admera	F	NA	2x150 PE, NextSeq 550	28757416	8.62722
Drosophila parabipectinata	par2-isoB	Flies provided by A. Kopp	Bernard Kim	MF	R9.4.1	Guppy 3.2.4+HAC	10	sequenced by Admera	M	NA	2x150 PE, HiSeq 4000	28904297	8.67129
Drosophila paulistorum	L06	Flies provided by D. Matute	Jeremy Wang/Bernard Kim	M	R9.4.1	Guppy 3.2.4+HAC	13.5	sequenced by UNC core	M	NA	2x150 PE, Illumina HiSeq 4000	50735849	15.2208
Drosophila paulistorum	L12	Flies provided by D. Matute	Jeremy Wang	M	R9.4.1	GridION + HAC	8.4	L06 (our data, different strain)	M	NA	2x150 PE (diff. strain), no SNV	50735849	15.2208
Drosophila persimilis	14011-0111.01	Raw reads from D. Miller	Danny Miller	F	R9.4.1	Guppy 3.1.5+HAC	6.22	Miller et al. 2018, SRA	M	SRR6425998	2x150 PE, HiSeq 2000	44108225	13.2325
Drosophila prosaltans	14045-0901.02	Flies provided by D. Matute	Jeremy Wang	M	R9.4.1	GridION + HAC	10.7	sequenced by Admera	M	NA	2x150 PE, Illumina HiSeq 4000	35741349	10.7224
Drosophila pruinosa	iso-A1 l-9	Flies provided by A. Kopp	Bernard Kim	M	R9.4.1	Guppy 3.2.4+HAC	8.2	sequenced by Kopp Lab	M	NA	2x150 PE, Illumina HiSeq 4000	17895097	5.36853
Drosophila pseudoobscura	14011-0121.94	Raw reads from D. Miller	Danny Miller	F	R9.4.1	Guppy 3.1.5+HAC	5.27	Miller et al. 2018, SRA	M	SRR6426001	2x150 PE, HiSeq 2000	40669775	12.2009
Drosophila quadrilineata	TMU E-14402	Flies provided by A. Kopp	Bernard Kim	M	R9.4.1	Guppy 3.2.4+HAC	8.3	Downloaded from SRA	M	SRR9426094	2x100 PE, Illumina HiSeq 2500	46177120	9.23542
Drosophila repleta	kari30	Flies provided by D. Matute	Jeremy Wang	M	R9.4.1	Guppy 3.2.4+HAC	5.1	WT mass bred SRA	MF (?)	SRR7362832	2x150 PE, Illumina HiSeq 4000	35330402	10.5991
Drosophila repletoides	ISZ-isoB I-10	Flies provided by A. Kopp	Bernard Kim	M	R9.4.1	Guppy 3.2.4+HAC	6.4	sequenced by Kopp Lab	M	NA	2x150 PE, Illumina HiSeq 4000	17729720	5.31892
Drosophila rhopaloa	14029-0021.01 (modENCODE)	Flies provided by A. Kopp	Bernard Kim	MF	R9.4.1	Guppy 3.2.2+HAC	13.8	modENCODE, SRA	F (?)	SRR345538	2x125 PE, Genome Analyzer IIx	42338083	12.7014
Drosophila rufa	EH091 iso-C L_3	Flies provided by A. Kopp	Bernard Kim	F	R9.4.1	Guppy 3.0.3+HAC	14.21	sequenced by Admera	F	NA	2x150 PE, NextSeq 550	39264612	11.7794
Drosophila saltans	14045-0911.00	Flies provided by D. Matute	Jeremy Wang	M	R9.4.1	GridION + HAC	11.3	sequenced by Admera	M	NA	2x150 PE, Illumina HiSeq 4000	47129114	14.1387
Drosophila sechellia	14021-0248.01	Raw reads from D. Miller	Danny Miller	F	R9.4.1	Guppy 3.0.3+HAC	3.91	Miller et al. 2018, SRA	M	SRR6426002	2x150 PE, HiSeq 2000	47818963	14.3457
Drosophila simulans	14021-0251.006	Raw reads from D. Miller	Danny Miller	F	R9.4.1	Guppy 3.0.3+HAC	4.69	Miller et al. 2018, SRA	M	SRR6425999	2x150 PE, HiSeq 2000	30537217	9.16117
Drosophila sp. aff chauvacae	mont_up-71	Flies provided by D. Matute	Jeremy Wang/Bernard Kim	M	R9.4.1	Guppy 3.2.4+HAC	9.6	sequenced by UNC core	M	NA	2x150 PE, Illumina HiSeq 4000	48787308	14.6362
Drosophila sproati	DKPTOMS02	Flies provided by D. Price	Bernard Kim	MF	R10	Guppy 3.2.4+HAC	7.1	from Ellie Armstrong/Don Price	M	PRJNA593822	2x100 PE, ?	50733818	10.1468
Drosophila sturtevanti	14043-0871.01	Flies provided by D. Miller	Danny Miller	F	R9.4.1	Guppy 3.2.4+HAC	5	sequenced by Admera	M	NA	2x150 PE, NextSeq 550	20916033	6.27481
Drosophila subobscura	Kusnacht	Flies provided by M. Stamenković-Radak	Bernard Kim	M	R9.4.1	Guppy 3.2.4+HAC	7.2	Downloaded from SRA	M	DRR061020	2x150 PE, Illumina HiSeq 2500	75030591	22.5092
Drosophila subpulchrella	L1	Flies provided by D. Matute	Jeremy Wang	M	R9.4.1	Guppy 3.2.4+HAC	8	no data
Drosophila sucinea	14030-0791.01	Flies provided by N. Whiteman	Bernard Kim	M	R9.4.1	Guppy 3.2.4+HAC	8.1	sequenced by Admera	M	NA	2x150 PE, Illumina HiSeq 4000	40246264	12.0739
Drosophila takahashii	IR98-3 E-12201	Flies provided by S. Elgin	Bernard Kim	F	R9.4.1	Guppy 3.0.3+HAC	11.35	sequenced by Admera	F	NA	2x150 PE, NextSeq 550	44520685	13.3562
Drosophila teissieri	CT02	Flies provided by D. Matute	Jeremy Wang	M	R9.4.1	Guppy 3.2.4+HAC	9	bata2 (SRA data, diff. strain)	F	SRR5860576 + SRR1774232	1x100 SE, no SNV	31914360	3.19144
Drosophila teissieri	273.3	Flies provided by D. Matute	Jeremy Wang	M	R9.4.1	Guppy 3.2.4+HAC	8.7	bata2 (SRA data, diff. strain)	F	SRR5860576 + SRR1774232	1x100 SE, no SNV	31914360	3.19144
Drosophila triauraria	14028-0691.9	Raw reads from D. Miller	Danny Miller	F	R9.4.1	Guppy 3.1.5+HAC	3.6	Miller et al. 2018, SRA	M	SRR7285293	2x150 PE, HiSeq 2000	45053729	13.5161
Drosophila tristis	D2	Flies provided by M. Stamenković-Radak	Bernard Kim	M	R9.4.1	Guppy 3.2.4+HAC	6.1	sequenced by Admera	M	NA	2x150 PE, Illumina HiSeq 4000	49981287	14.9944
Drosophila tropicalis	14030-0801.00	Flies provided by D. Matute	Jeremy Wang	M	R9.4.1	GridION + HAC	10.8	no data
Drosophila varians	CKM15-L1	Flies provided by M. Masuta via A. Kopp	Bernard Kim	MF	R9.4.1	Guppy 3.2.4+HAC	7.2	sequenced by Admera	MF	NA	2x150 PE, Illumina HiSeq 4000	31356343	9.4069
Drosophila virilis	15010-1051.87	Raw reads from D. Miller	Danny Miller	F	R9.4.1	Guppy 3.0.3+HAC	7.01	Miller et al. 2018, SRA	M	SRR6426000	2x150 PE, HiSeq 2000	36959452	11.0878
Drosophila willistoni	14030-0811.00	Raw reads from D. Miller	Danny Miller	F	R9.4.1	Guppy 3.0.3+HAC	5.7	Miller et al. 2018, SRA	M	SRR6426003	2x150 PE, HiSeq 2000	38616267	11.5849
Drosophila willistoni	14030-0811.17	Flies provided by N. Whiteman	Bernard Kim	M	R9.4.1	Guppy 3.2.4+HAC	9.1	sequenced by Admera	M	NA	2x150 PE, Illumina HiSeq 4000	30663589	9.19908
Drosophila yakuba	14021-0261.01	Raw reads from D. Miller	Danny Miller	F	R9.4.1	Guppy 3.0.3+HAC	3.62	Miller et al. 2018, SRA	M	SRR6426004	2x150 PE, HiSeq 2000	42328042	12.6984
Leucophenga varia	nc01v	Flies provided by D. Matute	Jeremy Wang	M	R9.4.1	Guppy 3.2.4+HAC	8.3	no data
Lordiphosa clarofinis	Guizhou062018LC	Flies provided by J. Gao via A. Kopp	Bernard Kim	MF	R9.4.1	Guppy 3.5.1+HAC	13	sequenced by Admera	MF	NA	2x150 PE, Illumina HiSeq 4000	157816578	47.345
Lordiphosa collinella	UCKTSapporo052019LC	Flies provided by H. Watabe and M. Toda via A. Kopp	Bernard Kim	MF	R9.4.1	Guppy 3.5.1+HAC	20	sequenced by Admera	MF	NA	2x150 PE, Illumina HiSeq 4000	80947952	24.2844
Lordiphosa magnipectinata	UCKTSapporo052019LM	Flies provided by H. Watabe and M. Toda via A. Kopp	Bernard Kim	MF	R9.4.1	Guppy 3.5.1+HAC	13.4	sequenced by Admera	MF	NA	2x150 PE, Illumina HiSeq 4000	201127314	60.3382
Lordiphosa mommai	MMSapporo052014LM	Flies provided by H. Watabe and M. Toda via A. Kopp	Bernard Kim	MF	R9.4.1	Guppy 3.5.1+HAC	13	sequenced by Admera	MF	NA	2x150 PE, Illumina HiSeq 4000	83530868	25.0593
Lordiphosa stackelbergi	UCILTSSapporo052019LS	Flies provided by H. Watabe and M. Toda via A. Kopp	Bernard Kim	MF	R9.4.1	Guppy 3.5.1+HAC	12.5	sequenced by Admera	MF	NA	2x150 PE, Illumina HiSeq 4000	90946536	27.284
Scaptomyza graminum	TMU-2019	DNA and data sent by A. Takahashi	Yoshitaka Ogawa/Aya Takahashi	F	R9.4.1	Guppy 3.2.4+HAC	12.6	sequenced by Admera	F	NA	2x150 PE, NextSeq 550	21970501	6.59115
Scaptomyza hsui	iso-CA-L1	Flies provided by N. Whiteman	Bernard Kim	MF	R9.4.1	Guppy 3.2.4+HAC	13.2	sequenced by Admera	M	NA	2x150 PE, Illumina HiSeq 4000	50611095	15.1833
Scaptomyza montana	iso-CA-L1	Flies provided by N. Whiteman	Bernard Kim	MF	R9.4.1	Guppy 3.2.4+HAC	11.2	sequenced by Admera	M	NA	2x150 PE, Illumina HiSeq 4000	41414078	12.4242
Scaptomyza pallida	iso-CA-L1	Flies provided by N. Whiteman	Bernard Kim	MF	R9.4.1	Guppy 3.2.4+HAC	19.9	sequenced by Admera	M	NA	2x150 PE, Illumina HiSeq 4000	39423383	11.827
Zaprionus africanus	BS06	Flies provided by D. Matute	Jeremy Wang	M	R9.4.1	Guppy 3.2.4+HAC	6.6	sequenced by Admera	M	NA	2x150 PE, Illumina HiSeq 4000	30454904	9.13647
Zaprionus camerounensis	jd01cam	Flies provided by D. Matute	Jeremy Wang/Bernard Kim	M	R9.4.1	Guppy 3.2.4+HAC	9	sequenced by UNC core	M	NA	2x150 PE, Illumina HiSeq 4000	69007792	20.7023
Zaprionus capensis	jd01cap	Flies provided by D. Matute	Jeremy Wang	M	R9.4.1	Guppy 3.2.4+HAC	11.7	sequenced by Admera	M	NA	2x150 PE, Illumina HiSeq 4000	26918739	8.07562
Zaprionus davidi	jd01d	Flies provided by D. Matute	Jeremy Wang	M	R9.4.1	Guppy 3.2.4+HAC	8.3	sequenced by Admera	M	NA	2x150 PE, Illumina HiSeq 4000	41810304	12.5431
Zaprionus gabonicus	jd01gab	Flies provided by D. Matute	Jeremy Wang	M	R9.4.1	Guppy 3.2.4+HAC	9.4	sequenced by Admera	M	NA	2x150 PE, Illumina HiSeq 4000	34252299	10.2757
Zaprionus ghesquierei	jd01ghe	Flies provided by D. Matute	Jeremy Wang/Bernard Kim	M	R9.4.1	Guppy 3.2.4+HAC	8.6	sequenced by UNC core	M	NA	2x150 PE, Illumina HiSeq 4000	67997055	20.3991
Zaprionus indianus	CDD18	Flies provided by D. Matute	Jeremy Wang	M	R9.4.1	Guppy 3.2.4+HAC	6.9	sequenced by Admera	M	NA	2x150 PE, Illumina HiSeq 4000	33728943	10.1187
Zaprionus indianus	BS02	Flies provided by D. Matute	Jeremy Wang/Bernard Kim	M	R9.4.1	Guppy 3.2.4+HAC	6.6	CDD18 (our data, diff. strain)	M	NA	2x150 PE (diff. strain), no SNV	33728943	10.1187
Zaprionus indianus	RCR04	Flies provided by D. Matute	Jeremy Wang	M	R9.4.1	GridION + HAC	13.6	sequenced by Admera	M	NA	2x150 PE, Illumina HiSeq 4000	40235772	12.0707
Zaprionus indianus	16GNV01	Flies provided by D. Matute	Jeremy Wang	M	R9.4.1	GridION + HAC	2.1	sequenced by UNC core	M	NA	2x150 PE, Illumina HiSeq 4000	18460241	5.53807
Zaprionus inermis	18BSZ10	Flies provided by D. Matute	Jeremy Wang	M	R9.4.1	Guppy 3.2.4+HAC	9.4	sequenced by Admera	M	NA	2x150 PE, Illumina HiSeq 4000	33033062	9.90992
Zaprionus kolodkinae	jd01k	Flies provided by D. Matute	Jeremy Wang	M	R9.4.1	Guppy 3.2.4+HAC	9.1	sequenced by Admera	M	NA	2x150 PE, Illumina HiSeq 4000	34602241	10.3807
Zaprionus lachaisei	jd01l	Flies provided by D. Matute	Jeremy Wang	M	R9.4.1	GridION + HAC	12.4	no data
Zaprionus nigranus	st01n	Flies provided by D. Matute	Jeremy Wang	M	R9.4.1	GridION + HAC	8.1	sequenced by UNC core	M	NA	2x150 PE, Illumina HiSeq 4000	17204635	5.16139
Zaprionus ornatus	jd01o	Flies provided by D. Matute	Jeremy Wang/Bernard Kim	M	R9.4.1	Guppy 3.2.4+HAC	12.2	sequenced by UNC core	M	NA	2x150 PE, Illumina HiSeq 4000	55348045	16.6044
Zaprionus taronus	st01t	Flies provided by D. Matute	Jeremy Wang	M	R9.4.1	Guppy 3.2.4+HAC	8.9	no data
Zaprionus tsacasi	jd01t	Flies provided by D. Matute	Jeremy Wang/Bernard Kim	M	R9.4.1	Guppy 3.2.4+HAC	14	sequenced by UNC core	M	NA	2x150 PE, Illumina HiSeq 4000	49665362	14.8996
Zaprionus tsacasi	car7-4	Flies provided by D. Matute	Jeremy Wang	M	R9.4.1	Guppy 3.2.4+HAC	7.5	sequenced by Admera	M	NA	2x150 PE, Illumina HiSeq 4000	38138762	11.4416
Zaprionus vittiger	jd01v	Flies provided by D. Matute	Jeremy Wang	M	R9.4.1	Guppy 3.2.4+HAC	5.3	sequenced by UNC core	M	NA	2x150 PE, Illumina HiSeq 4000	64715706	19.4147
