# Supplementary material for: Highly contiguous assemblies of 101 drosophilid genomes
Source: eLife. 2021 Jul 19;10:e66405. doi: 10.7554/eLife.66405 (PMC8337076; doi:10.7554/eLife.66405)
Supplement: Supplementary file 2. [file elife-66405-supp2.xlsx]

## Sheet: Table S2
		Flye parameters	Final assembly statistics
Species	strain/sample designation	Genome size est. (Mb)	N50 (Mb)	NG50 (bp)	auN (bp)	Size (Mb)	Contigs (count)	BUSCO (diptera_odb10)	Est. genome size from BUSCOs (Mbp)	Est. genome size from k-mers (Mbp)
Chymomyza costata	Sapporo	350	8.1	7086474	14067346	315.2	815	C:99.0%[S:98.2%,D:0.8%],F:0.2%,M:0.8%,n:3285	321.995	350.553
Drosophila ambigua	R42	200	11.3	11334561	11675992	161.3	172	C:99.0%[S:98.3%,D:0.7%],F:0.3%,M:0.7%,n:3285	168.4	148.972
Drosophila americana	Anderson	180	20.8	20798877	20128659	183.6	591	C:99.3%[S:98.7%,D:0.6%],F:0.2%,M:0.5%,n:3285	199.34	161.531
Drosophila ananassae	14024-0371.13	196.6	4.6	2897771	7389490	173.9	982	C:99.1%[S:98.8%,D:0.3%],F:0.2%,M:0.7%,n:3285	199.866	176.951
Drosophila arawakana	15182-2261.03	200	4.9	4317627	6213975	171.4	844	C:99.0%[S:97.9%,D:1.1%],F:0.2%,M:0.8%,n:3285	176.653	122.782
Drosophila biarmipes	361.0 iso1 l-11	195.6	23.4	23381765	17500420	185.3	284	C:99.3%[S:98.9%,D:0.4%],F:0.1%,M:0.6%,n:3285	182.993	186.789
Drosophila bipectinata	4-4-2-3-1-1-1-1-1 BackUp	204.6	15.8	15278745	17465756	192.4	125	C:99.3%[S:98.6%,D:0.7%],F:0.1%,M:0.6%,n:3285	200.998	181.123
Drosophila bocqueti	YAK3_mont-66	200	20.2	10747408	13112531	173	315	C:99.1%[S:98.3%,D:0.8%],F:0.2%,M:0.7%,n:3285	185.777	218.206
Drosophila cardini	15181-2181.03	190	4.2	3359202	7394034	181.3	2206	C:99.0%[S:98.3%,D:0.7%],F:0.2%,M:0.8%,n:3285	209.28	113.046
Drosophila carrolli	KB866	200	14	14004682	13804909	231.2	338	C:98.5%[S:97.9%,D:0.6%],F:0.2%,M:1.3%,n:3285	227.959	180.498
Drosophila dunni	15182-2291.00	182	14	3715773	11769875	177.5	4231	C:99.2%[S:98.7%,D:0.5%],F:0.2%,M:0.6%,n:3285	249.778	142.016
Drosophila elegans	14027-0461.03 (modENCODE)	192.2	21.9	21933072	17042393	178.4	734	C:99.3%[S:99.1%,D:0.2%],F:0.1%,M:0.6%,n:3285	165.201	154.018
Drosophila equinoxialis	14030-0741.00	200	6.6	3385414	7261106	221.7	1029	C:98.5%[S:97.3%,D:1.2%],F:0.5%,M:1.0%,n:3285	279.6	NA
Drosophila ercepeae	14024-0432.00	200	22.3	22310376	16423088	179	200	C:99.3%[S:98.7%,D:0.6%],F:0.1%,M:0.6%,n:3285	179.41	156.945
Drosophila erecta	14021-0224.01	158.9	20.4	19827742	17979009	135.7	515	C:99.4%[S:99.2%,D:0.2%],F:0.1%,M:0.5%,n:3285	150.625	122.856
Drosophila eugracilis	14026-0451.02	228.9	2.3	1196806	3848318	164.8	2174	C:99.4%[S:99.0%,D:0.4%],F:0.2%,M:0.4%,n:3285	188.715	152.34
Drosophila ficusphila	14025-0441.05 (modENCODE)	190.8	10	14223806	13338562	167.8	855	C:99.2%[S:98.9%,D:0.3%],F:0.3%,M:0.5%,n:3285	155.768	NA
Drosophila funebris	fst01	154	14.1	14085961	15988716	154.2	299	C:98.7%[S:98.3%,D:0.4%],F:0.2%,M:1.1%,n:3285	166.876	NA
Drosophila fuyamai	KB-1217	264.1	4.1	7121725	7739673	229.1	894	C:99.3%[S:98.4%,D:0.9%],F:0.1%,M:0.6%,n:3285	207.848	203.434
Drosophila grimshawi	15287-2541.00	200.4	23.3	23651295	15933737	191.4	1381	C:99.1%[S:98.5%,D:0.6%],F:0.3%,M:0.6%,n:3285	155.935	NA
Drosophila immigrans	15111.1731.12	299	9.7	8751091	12065049	183.3	1273	C:99.3%[S:98.4%,D:0.9%],F:0.2%,M:0.5%,n:3285	189.835	190.938
Drosophila immigrans	kari17	173	4.6	1857339	5366873	163.7	2429	C:98.8%[S:98.0%,D:0.8%],F:0.2%,M:1.0%,n:3285	202.48	NA
Drosophila insularis	jp01i	200	6.3	6217989	8757041	212.4	2337	C:99.0%[S:98.4%,D:0.6%],F:0.2%,M:0.8%,n:3285	233.635	171.312
Drosophila jambulina	14028-0671.01	202.7	24.6	24616268	20835634	179.7	114	C:99.3%[S:98.7%,D:0.6%],F:0.2%,M:0.5%,n:3285	185.74	174.043
Drosophila kikkawai	14028-0561.14 (modENCODE)	210.2	21.8	27625346	19459594	188.8	454	C:99.6%[S:98.8%,D:0.8%],F:0.1%,M:0.3%,n:3285	160.936	175.911
Drosophila kurseongensis	SaPa58	264.1	10.8	10767929	14535927	206.4	268	C:99.0%[S:98.4%,D:0.6%],F:0.3%,M:0.7%,n:3285	204.204	166.845
Drosophila littoralis	Kilpisjärvi 1	200	7.1	9316380	11085540	236.8	638	C:99.3%[S:98.8%,D:0.5%],F:0.2%,M:0.5%,n:3285	212.532	171.334
Drosophila m. malerkotliana	mal0-isoC	204.9	20.1	20136493	15769806	191.3	203	C:99.3%[S:98.7%,D:0.6%],F:0.1%,M:0.6%,n:3285	180.899	158.382
Drosophila m. pallens	palQ-isoG	204.9	10.9	18151524	13916061	191.1	393	C:99.0%[S:98.0%,D:1.0%],F:0.3%,M:0.7%,n:3285	179.469	159.272
Drosophila mauritiana	14021-0241.01	157.9	20.9	13594492	15415492	130.1	475	C:99.7%[S:99.3%,D:0.4%],F:0.1%,M:0.2%,n:3285	147.858	125.634
Drosophila melanogaster	BDGP ISO-1	143.9	22.5	21975285	19039025	144.7	303	C:99.5%[S:99.1%,D:0.4%],F:0.1%,M:0.4%,n:3285	148.935	141.145
Drosophila mojavensis	15081-1352.22	166.3	24.9	17229963	19108968	163.2	303	C:99.2%[S:98.8%,D:0.4%],F:0.3%,M:0.5%,n:3285	172.121	142.864
Drosophila murphyi	DKPHETFM01	200.4	11.4	10165003	11563259	153.6	1265	C:99.2%[S:98.7%,D:0.5%],F:0.3%,M:0.5%,n:3285	182.561	145.715
Drosophila sucinea**	14030-0761.01	200	14.7	14734183	18651526	190.5	113	C:99.3%[S:98.7%,D:0.6%],F:0.1%,M:0.6%,n:3285	215.452	147.931
Drosophila neocordata	14041-0831.00	200	6	4767334	10267341	194.8	1289	C:99.1%[S:98.3%,D:0.8%],F:0.2%,M:0.7%,n:3285	227.729	130.199
Drosophila obscura	BZ-5	180	3.9	3829373	6088320	179.8	216	C:99.2%[S:98.4%,D:0.8%],F:0.3%,M:0.5%,n:3285	187.343	152.49
Drosophila oshimai	MT-04	200	2.6	2425786	6835386	181.1	323	C:98.9%[S:98.1%,D:0.8%],F:0.5%,M:0.6%,n:3285	183.938	257.624
Drosophila p. nigrens	VT04-31 Hanoi	224	6.1	6062361	6655780	187.7	301	C:98.7%[S:97.5%,D:1.2%],F:0.4%,M:0.9%,n:3285	191.265	230.988
Drosophila p. pseudoananassae	Wau 125	228.4	7.4	7392541	9566840	193.7	78	C:98.8%[S:98.2%,D:0.6%],F:0.4%,M:0.8%,n:3285	197.709	NA
Drosophila parabipectinata	par2-isoB	210.8	11.6	20033903	14654965	209.9	555	C:99.2%[S:98.6%,D:0.6%],F:0.2%,M:0.6%,n:3285	202.232	172.994
Drosophila paulistorum	L06	250	16.5	23949140	18509406	321.2	830	C:99.1%[S:98.1%,D:1.0%],F:0.2%,M:0.7%,n:3285	260.45	201.592
Drosophila paulistorum	L12	200	2.2	3745713	5747915	256.8	1891	C:99.3%[S:98.4%,D:0.9%],F:0.2%,M:0.5%,n:3285	221.283	NA
Drosophila persimilis	14011-0111.01	197.1	4.1	3406128	5360411	152.8	1084	C:99.2%[S:98.3%,D:0.9%],F:0.3%,M:0.5%,n:3285	180.377	138.909
Drosophila prosaltans	14045-0901.02	200	2.7	2079114	3804456	214.1	2402	C:99.4%[S:98.8%,D:0.6%],F:0.1%,M:0.5%,n:3285	257.588	165.636
Drosophila pruinosa	iso-A1 l-9	200	17.7	18956508	21399560	201.1	473	C:98.8%[S:98.2%,D:0.6%],F:0.3%,M:0.9%,n:3285	176.38	171.499
Drosophila pseudoobscura	14011-0121.94	167.7	5.4	3241246	6304117	149.8	818	C:99.3%[S:98.4%,D:0.9%],F:0.2%,M:0.5%,n:3285	178.794	150.091
Drosophila quadrilineata	TMU E-14402	200	17.4	18636425	15795516	202.6	454	C:99.0%[S:98.5%,D:0.5%],F:0.3%,M:0.7%,n:3285	175.44	185.878
Drosophila repleta	kari30	158	9.3	9288829	11807150	154	776	C:97.8%[S:97.5%,D:0.3%],F:0.5%,M:1.7%,n:3285	166.834	138.279
Drosophila repletoides	ISZ-isoB I-10	200	18.8	18762850	15873121	181.4	240	C:99.3%[S:98.4%,D:0.9%],F:0.2%,M:0.5%,n:3285	208.391	172.827
Drosophila rhopaloa	14029-0021.01 (modENCODE)	200	15.8	11808632	14026153	193.5	228	C:98.6%[S:98.1%,D:0.5%],F:0.2%,M:1.2%,n:3285	210.376	185.88
Drosophila rufa	EH091 iso-C L_3	255.4	24.7	24719385	20393793	208.4	187	C:98.9%[S:98.2%,D:0.7%],F:0.2%,M:0.9%,n:3285	223.654	232.996
Drosophila saltans	14045-0911.00	200	3	2563471	5687958	249.3	2394	C:99.2%[S:98.5%,D:0.7%],F:0.1%,M:0.7%,n:3285	272.375	135.857
Drosophila sechellia	14021-0248.01	166.7	16.6	9571569	11263182	147.9	538	C:99.5%[S:99.1%,D:0.4%],F:0.1%,M:0.4%,n:3285	156.165	133.928
Drosophila simulans	14021-0251.006	159.6	21.1	21142363	19445139	133.6	256	C:99.4%[S:99.1%,D:0.3%],F:0.2%,M:0.4%,n:3285	134.852	121.778
Drosophila sp. (unknown Sao Tome mushroom)	st01m	200	12.5	12131160	13738960	146	1717	C:98.1%[S:97.7%,D:0.4%],F:0.7%,M:1.2%,n:3285	163.024	NA
Drosophila sp. aff chauvacae	mont_up-71	200	5.3	9171146	11051482	212.1	980	C:99.4%[S:96.4%,D:3.0%],F:0.2%,M:0.4%,n:3285	188.487	184.706
Drosophila sproati	DKPTOMS02	200.4	8	7964422	8264036	138.1	122	C:99.4%[S:98.7%,D:0.7%],F:0.2%,M:0.4%,n:3285	147.378	155.182
Drosophila sturtevanti	14043-0871.01	180	3.9	3949872	6156211	172.6	710	C:97.6%[S:97.0%,D:0.6%],F:0.9%,M:1.5%,n:3285	174.234	NA
Drosophila subobscura	Kusnacht	130	17.8	17798419	15880319	136.9	172	C:99.6%[S:99.0%,D:0.6%],F:0.1%,M:0.3%,n:3285	139.393	131.592
Drosophila subpulchrella	L1	200	14.5	1467275	10807483	268.1	1410	C:97.8%[S:97.4%,D:0.4%],F:0.6%,M:1.6%,n:3285	265.134	190.93
Drosophila sucinea	14030-0791.01	200	8.1	6405847	10188730	184.7	202	C:99.0%[S:98.5%,D:0.5%],F:0.2%,M:0.8%,n:3285	206.011	142.917
Drosophila takahashii	IR98-3 E-12201	207.3	12.4	12380692	14199144	165.6	122	C:98.6%[S:98.3%,D:0.3%],F:0.1%,M:1.3%,n:3285	167.475	172.749
Drosophila teissieri	CT02	200	7.1	4860210	8858036	144.7	1176	C:98.5%[S:98.3%,D:0.2%],F:0.4%,M:1.1%,n:3285	173.007	NA
Drosophila teissieri	273.3	200	8.2	8222136	7636546	152.4	860	C:99.0%[S:98.7%,D:0.3%],F:0.5%,M:0.5%,n:3285	143.46	NA
Drosophila triauraria	14028-0691.9	170.5	0.933	915486	3564108	199.8	963	C:98.7%[S:97.9%,D:0.8%],F:0.3%,M:1.0%,n:3285	202.093	194.847
Drosophila tristis	D2	200	5.1	4642992	7025336	158.2	276	C:97.9%[S:97.4%,D:0.5%],F:0.3%,M:1.8%,n:3285	183.416	172.171
Drosophila tropicalis	14030-0801.00	200	5.1	4145788	8194241	211	1190	C:98.8%[S:97.7%,D:1.1%],F:0.4%,M:0.8%,n:3285	225.052	NA
Drosophila varians	CKM15-L1	200	22.9	22921383	18345189	143	139	C:99.4%[S:99.1%,D:0.3%],F:0.2%,M:0.4%,n:328	137.136	128.416
Drosophila virilis	15010-1051.87	325.4	11.5	9244915	12699535	168.2	427	C:99.4%[S:99.0%,D:0.4%],F:0.2%,M:0.4%,n:3285	218.73	165.747
Drosophila willistoni	14030-0811.00	205.4	3	2785540	4788447	185.6	1963	C:99.2%[S:98.4%,D:0.8%],F:0.2%,M:0.6%,n:3285	209.539	173.857
Drosophila willistoni	14030-0811.17	200	13.6	16306761	16511178	244.9	336	C:99.3%[S:98.5%,D:0.8%],F:0.2%,M:0.5%,n:3285	211.974	141.636
Drosophila yakuba	14021-0261.01	170.7	21.5	21469989	15393570	151.3	389	C:99.5%[S:99.2%,D:0.3%],F:0.2%,M:0.3%,n:3285	153.96	136.121
Leucophenga varia	nc01v	200	0.56	218398	1753110	303.6	3158	C:95.1%[S:91.8%,D:3.3%],F:1.9%,M:3.0%,n:3285	436.26	NA
Lordiphosa clarofinis	Guizhou062018LC	450	1.7	1449190	2274758	398.7	1152	C:98.3%[S:95.7%,D:2.6%],F:0.4%,M:1.3%,n:3285	440.615	641.119
Lordiphosa collinella	UCKTSapporo052019LC	450	0.345	355287	496613	375.1	3252	C:96.8%[S:94.1%,D:2.7%],F:0.5%,M:2.7%,n:3285	369.358	409.213
Lordiphosa magnipectinata	UCKTSapporo052019LM	450	0.305	263145	445859	416.5	5290	C:97.3%[S:94.9%,D:2.4%],F:1.2%,M:1.5%,n:3285	456.143	628.084
Lordiphosa mommai	MMSapporo052014LM	450	0.623	496076	909289	339.5	1549	C:97.2%[S:95.5%,D:1.7%],F:0.7%,M:2.1%,n:3285	389.197	255.561
Lordiphosa stackelbergi	UCILTSSapporo052019LS	450	0.077	46746	122536	451.4	14530	C:77.6%[S:75.8%,D:1.8%],F:2.6%,M:19.8%,n:3285	468.883	NA
Scaptomyza graminum	TMU-2019	200	17.4	17407008	13643697	137.8	352	C:98.6%[S:97.9%,D:0.7%],F:0.5%,M:0.9%,n:3285	155.995	154.126
Scaptomyza hsui	iso-CA-L1	220	5.3	5287883	7966349	223.5	313	C:98.8%[S:98.0%,D:0.8%],F:0.3%,M:0.9%,n:3285	214.524	158.491
Scaptomyza montana	iso-CA-L1	220	2.4	2625883	6750030	229.1	735	C:99.1%[S:97.9%,D:1.2%],F:0.3%,M:0.6%,n:3285	224.298	NA
Scaptomyza pallida	iso-CA-L1	220	4.3	5405555	4538498	201.7	273	C:98.5%[S:97.3%,D:1.2%],F:0.5%,M:1.0%,n:3285	185.177	NA
Zaprionus africanus	BS06	200	11.3	4205321	10691346	162.5	2340	C:99.2%[S:98.5%,D:0.7%],F:0.2%,M:0.6%,n:3285	210.045	135.984
Zaprionus camerounensis	jd01cam	200	14.5	14525333	14401582	167.2	748	C:99.2%[S:98.2%,D:1.0%],F:0.3%,M:0.5%,n:3285	165.976	152.218
Zaprionus capensis	jd01cap	200	16.9	16891087	14351000	166.8	1084	C:99.2%[S:98.0%,D:1.2%],F:0.3%,M:0.5%,n:3285	182.233	122.871
Zaprionus davidi	jd01d	200	16.2	13390033	15486909	156.1	1448	C:99.0%[S:98.1%,D:0.9%],F:0.4%,M:0.6%,n:3285	180.796	139.702
Zaprionus gabonicus	jd01gab	200	13.5	11434925	11974964	187.6	1584	C:99.3%[S:98.6%,D:0.7%],F:0.2%,M:0.5%,n:3285	199.439	159.694
Zaprionus ghesquierei	jd01ghe	200	9	10574242	10736166	198.1	866	C:98.9%[S:97.5%,D:1.4%],F:0.3%,M:0.8%,n:3285	175.974	273.8
Zaprionus indianus	CDD18	200	4.1	3288358	7088723	167.1	2762	C:99.1%[S:98.5%,D:0.6%],F:0.2%,M:0.7%,n:3285	194.889	131.961
Zaprionus indianus	BS02	200	6.5	9502699	9345517	202.4	850	C:98.4%[S:97.7%,D:0.7%],F:0.6%,M:1.0%,n:3285	185.306	NA
Zaprionus indianus	RCR04	200	6.8	11228990	8607280	197.3	1089	C:98.8%[S:98.1%,D:0.7%],F:0.3%,M:0.9%,n:3285	181.993	148.886
Zaprionus indianus	16GNV01	NA	0.774	489899	1013319	145.7	649	C:98.3%[S:97.8%,D:0.5%],F:0.5%,M:1.2%,n:3285	187.426	159.841
Zaprionus inermis	18BSZ10	155	5.6	4577311	5946063	149.6	1765	C:99.0%[S:98.3%,D:0.7%],F:0.4%,M:0.6%,n:3285	178.192	125.463
Zaprionus kolodkinae	jd01k	200	6.5	6029578	9956767	183	514	C:99.2%[S:98.4%,D:0.8%],F:0.3%,M:0.5%,n:3285	189.679	127.485
Zaprionus lachaisei	jd01l	200	9.2	9167822	8231825	148.4	777	C:98.7%[S:98.1%,D:0.6%],F:0.5%,M:0.8%,n:3285	162.618	NA
Zaprionus nigranus	st01n	200	2.2	2214536	3110521	187.9	536	C:97.1%[S:95.2%,D:1.9%],F:0.8%,M:2.1%,n:3285	184.326	145.141
Zaprionus ornatus	jd01o	202.3	11.2	11228854	14891296	206.8	318	C:99.0%[S:97.8%,D:1.2%],F:0.3%,M:0.7%,n:3285	204.014	156.372
Zaprionus taronus	st01t	172	6	4099593	6510941	162.9	1465	C:98.1%[S:96.9%,D:1.2%],F:0.6%,M:1.3%,n:3285	206.24	NA
Zaprionus tsacasi	jd01t	200	5.5	4042549	6218041	165.5	646	C:99.0%[S:98.4%,D:0.6%],F:0.4%,M:0.6%,n:3285	186.311	153.693
Zaprionus tsacasi	car7-4	147	2	1726523	2940661	144.9	2981	C:99.0%[S:98.4%,D:0.6%],F:0.4%,M:0.6%,n:3285	168.923	127.427
Zaprionus vittiger	jd01v	200	8.7	8723810	9824231	162.3	1157	C:99.1%[S:98.4%,D:0.7%],F:0.3%,M:0.6%,n:3285	168.546	142.611
