# Supplementary material for: Highly contiguous assemblies of 101 drosophilid genomes
Source: eLife. 2021 Jul 19;10:e66405. doi: 10.7554/eLife.66405 (PMC8337076; doi:10.7554/eLife.66405)
Supplement: Supplementary file 5. [file elife-66405-supp5.xlsx]

## Sheet: Table S5
reference location	query location	flybaseID	gene	type	length (bp)	strand	long homopolymer	duplicate contig	long read support	short read support	PacBio support	Solares support	repeat overlap?
chr2L:13309747-13309750	contig_9	FLYBASE:FBpp0428276	CG43778	del	3	-	no	no	polymorphic	no, good mapQ	no	not present	LINE/I-Jockey
chr2L:14736922-14736923	contig_9, contig_151*	FLYBASE:FBpp0080229	CG31835	del	1	-	yes	no	polymorphic	no, poor mapQ	no	no	none
chr2L:15661683-15661684	contig_9, contig_151*	FLYBASE:FBpp0080315	CG4587	ins	1	-	no	yes	no	no, poor mapQ	no	no	none
chr2L:15662028-15662029	contig_9, contig_151*	FLYBASE:FBpp0080315	CG4587	del	1	-	yes	yes	polymorphic	no, poor mapQ	no	no	none
chr2L:15671042-15671043	contig_9, contig_151*	FLYBASE:FBpp0080316	CG4587	ins	1	-	no	yes	no	no, poor mapQ	no	no	none
chr2L:15675700-15675701	contig_9, contig_151*	FLYBASE:FBpp0305442	CG4587	ins	1	-	no	yes	no	no, poor mapQ	no	no	none
chr2L:15675779-15675780	contig_9, contig_151*	FLYBASE:FBpp0305442	CG4587	ins	1	-	no	yes	no	no, poor mapQ	no	no	none
chr2L:15675834-15675835	contig_9, contig_151*	FLYBASE:FBpp0305442	CG4587	ins	1	-	no	yes	no	no, poor mapQ	no	no	none
chr2L:15675902-15675903	contig_9, contig_151*	FLYBASE:FBpp0305442	CG4587	ins	1	-	no	yes	no	no, poor mapQ	no	no	none
chr2L:15675940-15675941	contig_9, contig_151*	FLYBASE:FBpp0305442	CG4587	del	1	-	no	yes	no	no, poor mapQ	no	no	none
chr2L:15675960-15675961	contig_9, contig_151*	FLYBASE:FBpp0305442	CG4587	ins	1	-	no	yes	no	no, poor mapQ	no	no	none
chr2L:15676043-15676044	contig_9, contig_151*	FLYBASE:FBpp0305442	CG4587	del	1	-	no	yes	no	no, poor mapQ	no	no	none
chr2L:15676058-15676059	contig_9, contig_151*	FLYBASE:FBpp0305442	CG4587	del	1	-	no	yes	no	no, poor mapQ	no	no	none
chr2R:7828258-7828259	contig_1	FLYBASE:FBpp0087969	CG30382	del	1	+	yes	no	polymorphic	no, poor mapQ	no	no	none
chr2R:14191867-14191868	contig_1	FLYBASE:FBpp0086659	CG30069	del	1	+	yes	no	polymorphic	no, poor mapQ	no	no	none
chr2R:17158669-17158670	contig_1	FLYBASE:FBpp0086151	CG30458	ins	1	+	no	no	no	no	no	not present	Simple repeat
chr2R:20780551-20780552	contig_1	FLYBASE:FBpp0423213	CR44666	ins	4410	+	no	no	yes	no, poor mapQ	yes	yes	Tandem repeat
chr2R:20780704-20780705	contig_1	FLYBASE:FBpp0423213	CR44666	ins	12	+	no	no	yes	no, poor mapQ	yes	yes	Tandem repeat
chr2R:20782026-20782027	contig_1	FLYBASE:FBpp0423213	CR44666	ins	120	+	no	no	yes	no, poor mapQ	yes	yes	Tandem repeat
chr3L:11618730-11618731	contig_8	FLYBASE:FBpp0075871	Mu68Ca	ins	3	-	no	no	yes	no, poor mapQ	yes	yes	Tandem repeat
chr3L:11618733-11618734	contig_8	FLYBASE:FBpp0075871	Mu68Ca	ins	2397	-	no	no	yes	no, poor mapQ	yes	yes	Tandem repeat
chr3L:11969694-11969695	contig_8	FLYBASE:FBpp0075795	Mu68E	ins	1728	-	no	no	yes	no, poor mapQ	yes	yes	Tandem repeat
chr3L:14027719-14027722	contig_8	FLYBASE:FBpp0075526	Ptip	del	3	-	no	no	polymorphic	no	yes	not present	LINE/I-Jockey + Simple repeat
chr3R:12931589-12931607	contig_3	FLYBASE:FBpp0308006	beat-Vb	del	18	-	no	no	polymorphic	polymorphic	no	no	none
chr3R:20987597-20987598	contig_3	FLYBASE:FBpp0301131	Calx	ins	1414	-	no	no	yes	yes but odd coverage	yes	yes	none
chr4:1190367-1190368	contig_10	FLYBASE:FBpp0090952	CG33521	del	1	-	yes	no	polymorphic	no	no	no	none
chrX:5909293-5909296	contig_2	FLYBASE:FBpp0070790	CG12236	del	3	+	no	no	no	no	no	not present	Simple repeat
chrX:6277723-6277724	contig_2	FLYBASE:FBpp0311816	Ubi-p5E	del	1	+	yes	no	polymorphic	no, poor mapQ	no	no	none
chrX:7689108-7689111	contig_2	FLYBASE:FBpp0305405	CHES-1-like	del	3	+	no	no	polymorphic	polymorphic	no	not present	Simple repeat
chrX:9678403-9678406	contig_2	FLYBASE:FBpp0291862	nej	del	3	+	no	no	polymorphic	polymorphic	yes	not present	LINE/I-Jockey
chrX:12714735-12714738	contig_2	FLYBASE:FBpp0305909	Smr	del	3	+	no	no	polymorphic	no	no	not present	Simple repeat
chrX:14053650-14053651	contig_2	FLYBASE:FBpp0289368	ste:CG33237	del	1	+	no	no	no	no, poor mapQ	yes	yes	none
